# Supplementary material
Source: publisher figshare collection journal article supplement (https://sage.figshare.com/ndownloader/files/18037985)
Supplement: Supplementary file 1 [file 18037985]

# Online Appendices for: Patterns of Regime Breakdown since the French Revolution

Vilde Lunnan Djuve<sup>1</sup>, Carl Henrik Knutsen<sup>2</sup>, and Tore Wig<sup>2</sup>

<sup>1</sup>Department of Political Science, Aarhus University

<sup>2</sup>Department of Political Science, University of Oslo

May 29, 2019

These appendices contain additional information about the Historical Regimes Data (HRD) and some additional analyses not reported in the paper. More specifically, Appendix A lists all country-polity observations included in HRD as well as the wording of all the questions that were coded. Appendix B provides an overview of the data collection process and the division of labor within the team. Appendix C exemplifies the coding by presenting timelines as well as coding notes for a selected number of countries. Appendix D clarifies the use of the interregnum period coding in HRD.

The following appendices discuss key heuristics devised for the coding. Appendix E lists a number of events that are commonly used to identify candidates for regime breakdown as well as the thresholds applied for coding regime change and not for these events. Appendix F brings up, and specifies, the discussion of what to count as a “substantial change” to both formal and informal rules for leadership selection and maintenance, and goes through the key rules-of-thumb for determining this for the different regime end type categories. Appendix G clarifies and illustrates the considerations made when distinguishing between the three regime change categories that pertain to directed transitions or self-coups. Appendix H clarifies how the units (polities and their time series) are defined, and goes through different scenarios of regime change coding when polities merge or split up, including cases of decolonization.

Appendix I briefly illustrates results from a Bayesian change point model exercise, similar to that presented in the paper for all regime breakdowns, focusing only on regime breakdowns due to popular uprisings or only on regime breakdowns due to coups. Finally, Appendix J contains tables and additional discussions pertaining to robustness tests that are mentioned briefly in the paper, including regressions using different GDP and population data as well as regressions run on sub-samples of, respectively, democratic and autocratic regimes.

## A Questions and observations included in HRD

This appendix first lists the questions coded in HRD. Table A-1 at the end provides an overview of the polity-years included in the dataset. While HRD takes the definitions of country-units and time series from (Historical) V-Dem as its point of departure, please note that regimes that came to power before the start of the V-Dem time series, but controlled power at the first day of these time series, are also coded all the way back to the date the regime started.

**Regime interregnum** (*v3regint*)

**Question:** Does there exist an identifiable political regime?

**Clarification:** This question is used to identify so-called interregnum periods, where no political regime is in control over the entity. Different types of political situations can lead to periods of time under which there is no identifiable political regime, one example being a civil war in which none of the parties have clear control over political bodies and processes in the country. However, the interregnum coding is employed conservatively, meaning that partial control over political bodies and processes in fairly large parts of the country (which is often the case also during civil wars) is sufficient for a 0 score.

0. Yes

1. No

**Regime name** (*v3regname*)

**Question:** What is the name of this regime?

**Clarification:** If the regime is commonly referred to with a particular name in the international literature, such as “The Second French Republic”, then this name should be used. The exception to this rule is if the regime is only referred to by the name of the nation (e.g. “North Korean regime”). If multiple names are used interchangeably in the literature, select one of them. If there is no common name, try to provide a name that would be informative to scholars that have knowledge of the political history of the relevant country. If the time period in question is characterized by a so-called interregnum period, where no political regime is coded, please provide the name “Interregnum X-Y”, where X denotes the country and Y denotes the order (in time) of this interregnum period among all such periods (within the coded time series) for this particular country. E.g., the first coded interregnum period of Spain should be coded “Interregnum Spain-1”.

**Answer type:** Text

**Regime start date** (*v3regstartdate*)

**Question:** When did the political regime obtain power?

**Answer type:** Day/Month/Year

**Regime end date** (*v3regenddate*)

**Question:** When did the political regime lose power?

**Answer type:** Day/Month/Year

**Regime end type** (*v3regendtype*)

**Question:** Could you specify the types of processes (one or more) that led to the end of the regime?

0. A military coup d'état.
1. A coup d'état conducted by other groups than the military.
2. A self-coup (*autogolpe*) conducted by the sitting leader.
3. Assassination of the sitting leader (but not related to a coup d'état)
4. Natural death of the sitting leader
5. Loss in civil war.
6. Loss in inter-state war.
7. Foreign intervention (other than loss in inter-state war)
8. Popular uprising.
9. Substantial political liberalization/democratization with some form of guidance by sitting regime leaders
10. Other type of directed and intentional transformational process of the regime under the guidance of sitting regime leaders (excluding political liberalization)
11. Substantial political liberalization/democratization without guidance by sitting regime leaders, occurring from some other process (such as an unexpected election loss for the sitting regime) than those specified by categories 1 to 10
12. Other process than those specified by categories 0 to 11.
13. Regime still exists

**Answer type:** Single selection

**Regime end type, multiple selection** (*v3regendtypems*)

**Question:** Could you specify the type of process that you consider the most important in leading to the end of the regime?

0. A military coup d'état.
1. A coup d'état conducted by other groups than the military.
2. A self-coup (*autogolpe*) conducted by the sitting leader.
3. Assassination of the sitting leader (but not related to a coup d'état)
4. Natural death of the sitting leader
5. Loss in civil war.
6. Loss in inter-state war.
7. Foreign intervention (other than loss in inter-state war)
8. Popular uprising.
9. Substantial political liberalization/democratization with some form of guidance by sitting regime leaders
10. Other type of directed and intentional transformational process of the regime under the guidance of sitting regime leaders (excluding political liberalization)
11. Substantial political liberalization/democratization without guidance by sitting regime leaders, occurring from some other process (such as an unexpected election loss for the sitting regime) than those specified by categories 1 to 10
12. Other process than those specified by categories 0 to 11.
13. Regime still exists

**Answer type:** Multiple selection

| Country                       | Start year | End year | Country               | Start year | End year |
|-------------------------------|------------|----------|-----------------------|------------|----------|
| Afghanistan                   | 1747       | 2016     | Lithuania             | 1918       | 2016     |
| Albania                       | 1912       | 2016     | Luxembourg            | 1714       | 2016     |
| Algeria                       | 1830       | 2016     | Macedonia             | 1991       | 2016     |
| Angola                        | 1885       | 2016     | Madagascar            | 1797       | 2016     |
| Argentina                     | 1776       | 2016     | Malawi                | 1891       | 2016     |
| Armenia                       | 1922       | 2016     | Malaysia              | 1867       | 2016     |
| Australia                     | 1788       | 2016     | Maldives              | 1887       | 2016     |
| Austria                       | 1713       | 2016     | Mali                  | 1890       | 2016     |
| Azerbaijan                    | 1922       | 2016     | Mauritania            | 1904       | 2016     |
| Baden                         | 1112       | 1871     | Mauritius             | 1818       | 2016     |
| Bangladesh                    | 1971       | 2016     | Mecklenburg-Schwerin  | 1755       | 1871     |
| Barbados                      | 1663       | 2016     | Mexico                | 1784       | 2016     |
| Bavaria                       | 1623       | 1871     | Modena                | 1780       | 1861     |
| Belarus                       | 1991       | 2016     | Moldova               | 1991       | 2016     |
| Belgium                       | 1785       | 2016     | Mongolia              | 1911       | 2016     |
| Benin                         | 1895       | 2016     | Montenegro            | 1785       | 2016     |
| Bhutan                        | 1865       | 2016     | Morocco               | 1757       | 2016     |
| Bolivia                       | 1784       | 2016     | Mozambique            | 1836       | 2016     |
| Bosnia and Herzegovina        | 1992       | 2016     | Namibia               | 1884       | 2016     |
| Botswana                      | 1885       | 2016     | Nassau                | 1806       | 1866     |
| Brazil                        | 1763       | 2016     | Nepal                 | 1768       | 2016     |
| Brunswick                     | 1495       | 1918     | Netherlands           | 1747       | 2016     |
| Bulgaria                      | 1877       | 2016     | New Zealand           | 1823       | 2016     |
| Burkina Faso                  | 1919       | 2016     | Nicaragua             | 1823       | 2016     |
| Burma/Myanmar                 | 1782       | 2016     | Niger                 | 1922       | 2016     |
| Burundi                       | 1897       | 2016     | Nigeria               | 1914       | 2016     |
| Cambodia                      | 1863       | 2016     | Norway                | 1784       | 2016     |
| Cameroon                      | 1960       | 2016     | Oldenburg             | 1774       | 1871     |
| Canada                        | 1838       | 2016     | Oman                  | 1749       | 2016     |
| Cape Verde                    | 1879       | 2016     | Pakistan              | 1947       | 2016     |
| Central African Republic      | 1920       | 2016     | Panama                | 1903       | 2016     |
| Chad                          | 1914       | 2016     | Papal States          | 1775       | 1870     |
| Chile                         | 1787       | 2016     | Papua New Guinea      | 1888       | 2016     |
| China                         | 1722       | 2016     | Paraguay              | 1776       | 2016     |
| Colombia                      | 1717       | 2016     | Parma                 | 1748       | 1861     |
| Comoros                       | 1841       | 2016     | Peru                  | 1543       | 2016     |
| Congo, Democratic Republic of | 1885       | 2016     | Philippines           | 1898       | 2016     |
| Congo, Republic of the        | 1882       | 2016     | Poland                | 1764       | 2016     |
| Costa Rica                    | 1823       | 2016     | Portugal              | 1777       | 2016     |
| Croatia                       | 1941       | 2016     | Prussia               | 1701       | 1871     |
| Cuba                          | 1763       | 2016     | Qatar                 | 1916       | 2016     |
| Cyprus                        | 1878       | 2016     | Romania               | 1789       | 2016     |
| Czech Republic                | 1918       | 2016     | Russia                | 1762       | 2016     |
| Denmark                       | 1784       | 2016     | Rwanda                | 1897       | 2016     |
| Djibouti                      | 1896       | 2016     | Sao Tomé and Prncipe  | 1753       | 2016     |
| Dominican Republic            | 1700       | 2016     | Sardinia              | 1720       | 1861     |
| East Germany                  | 1949       | 1990     | Saudi-Arabia/Nejd     | 1744       | 2016     |
| East Timor                    | 1896       | 2016     | Saxe-Weimar-Eisenach  | 1741       | 1871     |
| Ecuador                       | 1819       | 2016     | Saxony                | 1356       | 1871     |
| Egypt                         | 1787       | 2016     | Senegal               | 1904       | 2016     |
| El Salvador                   | 1823       | 2016     | Serbia                | 1730       | 2016     |
| Eritrea                       | 1896       | 2016     | Seychelles            | 1903       | 2016     |
| Estonia                       | 1918       | 2016     | Sierra Leone          | 1896       | 2016     |
| Ethiopia/Abyssinia            | 1769       | 2016     | Singapore             | 1867       | 2016     |
| Fiji                          | 1874       | 2016     | Slovakia              | 1939       | 2016     |
| Finland                       | 1789       | 2016     | Slovenia              | 1991       | 2016     |
| France                        | 1768       | 2016     | Solomon Islands       | 1893       | 2017     |
| Gabon                         | 1920       | 2016     | Somalia               | 1889       | 2016     |
| Gambia                        | 1888       | 2017     | Somaliland            | 1888       | 2016     |
| Georgia                       | 1922       | 2016     | South Africa          | 1884       | 2016     |
| Germany                       | 1867       | 2016     | South Sudan           | 2011       | 2016     |
| Ghana                         | 1901       | 2016     | South Yemen           | 1839       | 1990     |
| Greece                        | 1821       | 2016     | Spain                 | 1700       | 2016     |
| Guatemala                     | 1697       | 2016     | Sri Lanka             | 1815       | 2016     |
| Guinea                        | 1895       | 2016     | Sudan                 | 1899       | 2016     |
| Guinea-Bissau                 | 1879       | 2016     | Suriname              | 1816       | 2016     |
| Guyana                        | 1831       | 2016     | Swaziland             | 1890       | 2016     |
| Haiti                         | 1697       | 2016     | Sweden                | 1789       | 2016     |
| Hamburg                       | 1712       | 1871     | Switzerland           | 1712       | 2016     |
| Hanover                       | 1803       | 1866     | Syria                 | 1918       | 2016     |
| Hesse-Darmstadt               | 1567       | 1871     | Taiwan                | 1895       | 2016     |
| Hesse-Kassel                  | 1567       | 1866     | Tajikistan            | 1991       | 2016     |
| Honduras                      | 1823       | 2016     | Tanzania              | 1916       | 2016     |
| Hungary                       | 1722       | 2016     | Thailand              | 1782       | 2016     |
| Iceland                       | 1814       | 2016     | Togo                  | 1916       | 2016     |
| India                         | 1784       | 2016     | Trinidad and Tobago   | 1889       | 2016     |
| Indonesia                     | 1800       | 2016     | Tunisia               | 1782       | 2016     |
| Iran/Persia                   | 1751       | 2016     | Turkey/Ottoman Empire | 1730       | 2017     |
| Iraq                          | 1920       | 2016     | Turkmenistan          | 1991       | 2016     |
| Ireland                       | 1801       | 2016     | Tuscany               | 1737       | 1861     |
| Italy                         | 1861       | 2016     | Two Sicilies          | 1759       | 1861     |
| Ivory Coast                   | 1895       | 2016     | Uganda                | 1894       | 2016     |
| Jamaica                       | 1670       | 2016     | Ukraine               | 1991       | 2016     |
| Japan                         | 1615       | 2016     | United Arab Emirates  | 1971       | 2016     |
| Jordan                        | 1921       | 2016     | United Kingdom        | 1701       | 2016     |
| Kazakhstan                    | 1991       | 2016     | United States         | 1788       | 2016     |
| Kenya                         | 1895       | 2016     | Uruguay               | 1825       | 2016     |
| Korea, North                  | 1945       | 2016     | Uzbekistan            | 1785       | 2016     |
| Korea, South                  | 1637       | 2016     | Vanuatu               | 1906       | 2016     |
| Kosovo                        | 1999       | 2016     | Venezuela             | 1777       | 2016     |
| Kuwait                        | 1756       | 2016     | Vietnam               | 1771       | 1945     |
| Kyrgyzstan                    | 1991       | 2016     | Vietnam, North        | 1945       | 2016     |
| Laos                          | 1893       | 2016     | Vietnam, South        | 1945       | 1975     |
| Latvia                        | 1918       | 2016     | Württemberg           | 1089       | 1871     |
| Lebanon                       | 1918       | 2016     | Yemen                 | 1716       | 2016     |
| Lesotho                       | 1884       | 2016     | Zambia                | 1911       | 2016     |
| Liberia                       | 1821       | 2016     | Zanzibar              | 1698       | 2016     |
| Libya/Tripolitania            | 1711       | 2016     | Zimbabwe              | 1890       | 2016     |
| Liechtenstein                 | 1866       | 2016     |                       |            |          |

Table A-1: Observations included in HRD

## B An overview of the data collection process

Several scholars (from the Historical V-Dem team) were involved in the deliberation and revision of the questions and definitions employed for the Historical Regime Data (HRD), after they had been originally formulated by the second author of this article. The broader operational criteria guiding the data collection were intentionally designed to reflect the conceptual regime definition discussed in the paper. To recapitulate, a regime is defined according to the formal or informal rules for the selection and maintenance of political leaders in power.

Regarding the actual data collection, the second and third authors started by producing first drafts of the more specific coding guidelines and lists of operational criteria for the coding. They thereafter trial-coded a subset of eight (quite diverse) countries. They thereafter revised the coding scheme based on observations made during the trial coding, and recruited and coordinated the RAs' coding in a hands-on manner early on (another round of specifications of the operational criteria was conducted while and after the three RAs that were first recruited had completed their first batches of countries).

In the end, the first author of the article – originally one of the three first recruited RAs – conducted the main bulk of the coding, which lasted for about two years in total. The observations coded by the first author includes all coding for 1920–2016 for all polities (except for double-coding related to inter-coder reliability tests), in addition to a substantial part of the historical coding. She also trained additional RA coders and quality-controlled the coding of the other coders to enhance internal consistency, before “hard decisions” were passed on to the second and third author of the article. One important strategy in this regard was the explicit instruction given to all RAs that they should provide alternative codings, with full documentation for all alternative solutions, whenever in doubt on how to delineate the regime units. Typically, this would entail a more “liberal” coding, with one or more regime changes throughout a given time interval, as well as a more “conservative” coding where the entire time interval was covered by one regime. At the end of the historical coding and then again at the end of the coding for 1920–2016, the second and third authors would separately read through all these “liberal”/“conservative” codings, identify and read through additional source material if needed. The two authors would then make suggestions for decisions to these cases, with a particular focus on applying the rules so that cross-time and cross-country consistency was ensured, and meet for deliberations. In the very few cases where the two authors were unable to land on a joint decision, they would bring in the relevant RA for discussions and, if needed, ask the RA to go back to/identify more sources before



settling the issue. More generally, internal consistency was also enhanced by continuous discussions between the authors and the RAs (and between the RAs), especially on how to settle dates, types of breakdown, and delineating regimes for tricky cases.

Among the RA coders, other than the first author, four focused on their respective batches of countries for the 1789–1920 period, with, e.g., one (Italian) RA coding Italian pre-unification states and one (German) RA coding German pre-unification states. All coders have drawn on several sources – mainly country-specific sources in the form of monographs written by historians or political scientists, research articles, or encyclopedias, but also cross-country sources such as the existing regime datasets listed in the article – to inform their coding decisions.

The sixth RA double-coded six selected countries from Latin America across the 20th and 21st centuries – mainly countries that we presumed to be especially hard cases – for consistency/reliability checks. For these six countries (Bolivia, Costa Rica, Mexico, Uruguay, Venezuela and Nicaragua), the double-coder identified the exact regime end dates and end types recorded by the original coder for 75 percent of the originally coded regimes (39/52). For another 10 percent (5 regimes), the double-coder identified the regime change dates identified by the original coder, but coded the end type differently. For the especially difficult case of Bolivia, 16 of the original coder’s total of 22 regimes since the turn of the 20th century were exactly identified by the double-coder. As noted in the paper, the second coder, for instance, failed to identify two coups in the 1930s that the original coder had identified from one particular source (Hudson and Hanratty, 1991, 28-32). The first was the regime change following the military command’s overthrow of president Salamanca during the Chaco War with Paraguay, leading to the instalment of his peace-seeking vice president. The second regime begins when a group of army officers decided to back the coup led by Col. Busch to overthrow president Toro in 1937, citing Toro’s unwillingness to challenge the tin oligarchy as his main reason. For the more straightforward case of Costa Rica, however, the fifth coder identified the exact same four regimes as the original coder.

## C Examples of regime coding and coding notes

In the paper, we provided an illustrative timeline of the coding of regime start- and end dates for Iran from 1925 onwards. Figure A-1 provides several other examples, covering the entire time series of the countries in question. At the same time, the timelines report *how* the various regimes ended. Specifically, we present time lines for Serbia, China, Mexico, France and Russia, with each regime death as recorded for the v3regendtype variable.

We then present tables with excerpts of the regime coding sheet for the set of countries in Figure A-1. These excerpts provide a brief historical exposition and justification for, for example, the coding of regime end dates of each regime. The full set of notes for all variables for each country can be found at ANONYMIZED WEBPAGE.

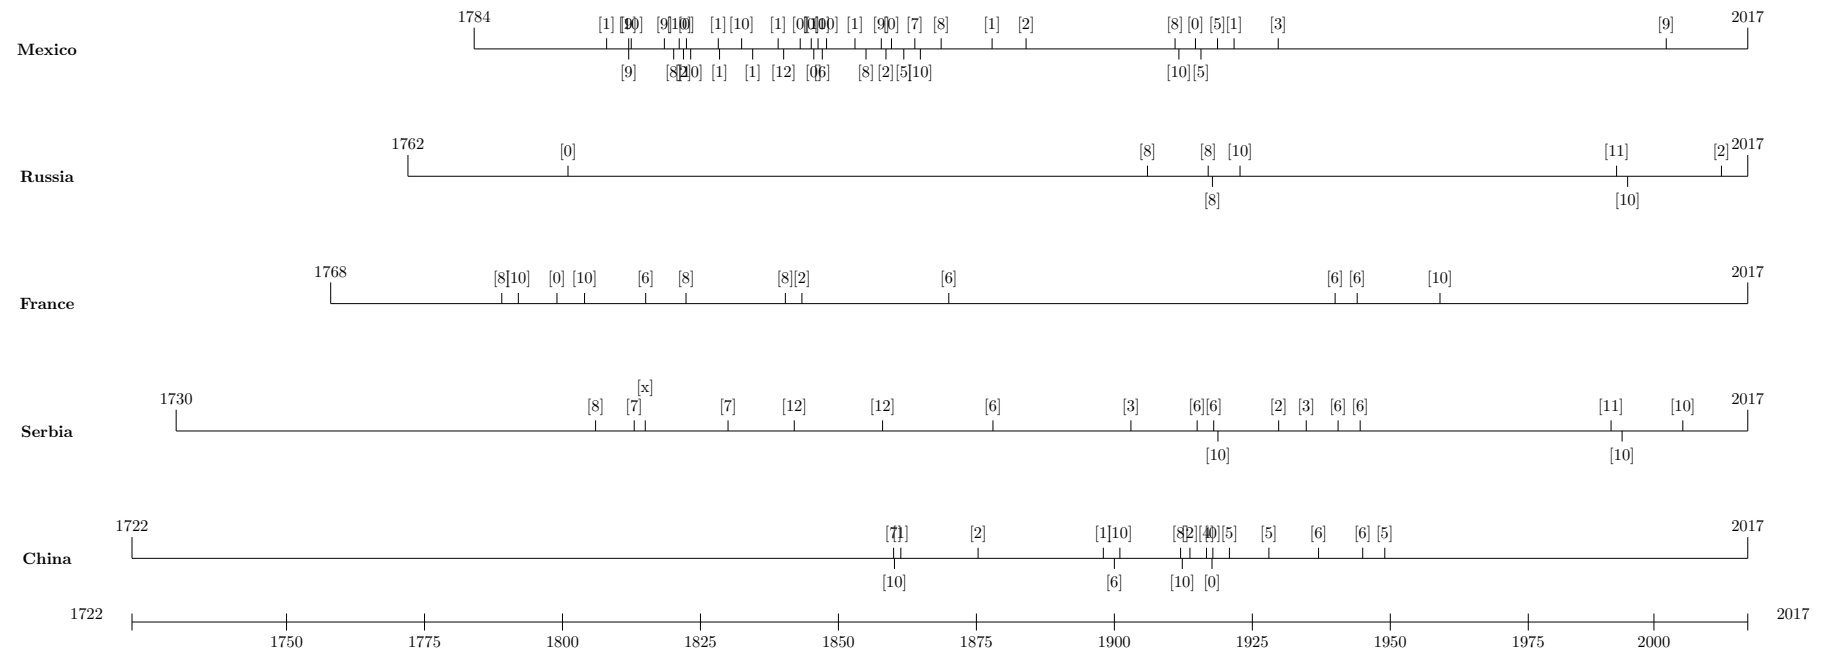

*Note:* x = Coding gap. 0 = A military coup d'etat. 1 = A coup d'etat conducted by other groups than the military. 2 = A self-coup (autogolpe).  
 3 = Assassination of the sitting leader. 4 = Natural death of the sitting leader. 5 = Loss in civil war 6 = Loss in inter-state war.  
 7 = Foreign intervention. 8 = Popular uprising. 9 = Substantial political liberalization with guidance by sitting regime.  
 10 = Other type of directed transition with guidance of sitting regime. 11 = Substantial political liberalization without guidance by sitting regime. 12 = Other process.

Figure A-1: Time lines of HRD for Mexico, Russia, France, Serbia and China

| Country name | V-Dem code | Regime name            | v3regstartdate |   | v3regenddate | Notes to v3regenddate                                                                                                                                                           | v3regend-typeMS | v3regend-type | Notes to v3regendtype                                                                                                                                | Sources                                                                                     |
|--------------|------------|------------------------|----------------|---|--------------|---------------------------------------------------------------------------------------------------------------------------------------------------------------------------------|-----------------|---------------|------------------------------------------------------------------------------------------------------------------------------------------------------|---------------------------------------------------------------------------------------------|
| Russia       | 11         | Early Imperial Russia  | 09/07/1762     | 0 | 23/03/1801   | Military coup d'état against Paul. After Paul was killed he was replaced by his son, Alexander I.                                                                               | 0               | 0             | Military coup d'état against Paul. After Paul was killed he was replaced by his son, Alexander I.                                                    | Freeze (2002: 115-116, 141). Moss (2005: 269, 333-334). Encyclopedia Britannica.            |
| Russia       | 11         | Late Imperial Russia   | 23/03/1801     | 0 | 06/05/1906   | The empire's Fundamental Laws were amended on May 6, 1906, to take account of the Duma and reforms promised in the October Manifesto.                                           | 8, 9            | 8             | Liberalization following the Revolution of 1905-06                                                                                                   | Freeze (2002: 215-220). Riasanovsky and Steinberg (2011: 402-405). Encyclopedia Britannica. |
| Russia       | 11         | Post-1906 Act          | 06/05/1906     | 0 | 11/03/1917   | Provisional government formed by the Duma - and thus sidestepping an imperial dissolution decree - as a response to the February Revolution of 1917.                            | 8, 11           | 8             | Provisional government formed by the Duma - and thus sidestepping an imperial dissolution decree - as a response to the February Revolution of 1917. | Freeze (2002: 235-240). Riasanovsky and Steinberg (2011: 466-473). Encyclopedia Britannica. |
| Russia       | 11         | Provisional government | 11/03/1917     | 0 | 07/11/1917   | The Soviets seized control of the government in November and drove the provisional government into exile, in the events that later have become known as the October Revolution. | 8               | 8             | Armed insurrection/ uprising followed by the dissolution of all vestiges of democracy.                                                               | Freeze (2002: 247-257). Riasanovsky and Steinberg (2011: 475-477, 488).                     |
| Russia       | 11         | Soviet Russia          | 07/11/1917     | 0 | 30/12/1922   | Formation of the Union of Soviet Socialist Republics.                                                                                                                           | 10              | 10            | Formation of the Union of Soviet Socialist Republics.                                                                                                | Riasanovsky and Steinberg (2011: 500). Encyclopedia Britannica.                             |
| Russia       | 11         | USSR                   | 30/12/1922     | 0 | 31/12/1991   | The U.S.S.R. legally ceased to exist on December 31, 1991.                                                                                                                      | 11              | 11            | Fall of Soviet coded as political liberalization without guidance by sitting regime                                                                  | Britannica                                                                                  |

| Country name | V-Dem code | Regime name                                   | v3regstartdate |   | v3regenddate | Notes to v3regenddate                                                                                                                                                                                                                                            | v3regend-typeMS | v3regend-type | Notes to v3regendtype                                                                               | Sources                                                       |
|--------------|------------|-----------------------------------------------|----------------|---|--------------|------------------------------------------------------------------------------------------------------------------------------------------------------------------------------------------------------------------------------------------------------------------|-----------------|---------------|-----------------------------------------------------------------------------------------------------|---------------------------------------------------------------|
| Russia       | 11         | Post-Soviet Russia                            | 31/12/1991     | 0 | 21/09/1993   | On 21 Sept, Yeltsin issued a series of presidential decrees that dissolved the parliament and imposed presidential rule that would exist until after elections to a new parliament and a referendum on a new draft constitution were held.                       | 10, 2           | 10            | Directed transition deemed most appropriate measure                                                 | Britannica                                                    |
| Russia       | 11         | Russian Federation                            | 21/09/1993     | 0 | 04/03/2012   | Putin re-elected in very widely fraudulent elections: end of 'managed democracy'                                                                                                                                                                                 | 10,2            | 2             | Directed transition, but the development overall deemed severe enough to be dubbed self-coup        | Britannica, Krastev and Holmes (2012)                         |
| Russia       | 11         | Putin's Russia                                | 04/03/2012     | 0 | E            |                                                                                                                                                                                                                                                                  |                 |               |                                                                                                     | Britannica, Krastev and Holmes (2012)                         |
| Serbia       | 198        | Ottoman Empire - Mahmud I - Selim III         | 28/09/1730     | 1 | 15/12/1806   | Though the first Serbian Uprising started in 1804, actual seizure of Belgrade did not succeed until 1806 (Stavrianos 1963)                                                                                                                                       | 8               | 8             | Popular uprising led by Karadjordje                                                                 | Britannica, Stavrianos 2000:19-20, Wikipedia                  |
| Serbia       | 198        | Serbian nationalist uprising                  | 15/12/1806     | 1 | 15/12/1813   | Ottomans retake Belgrade                                                                                                                                                                                                                                         | 6,7             | 7             | Coded foreign intervention because the Ottoman Empire was ultimately decisive in reclaiming Serbia. | Britannica, Stavrianos 1963:21-22, Mazover 2000:83, Wikipedia |
| Serbia       | 198        | Not to be coded                               | 15/12/1813     | 1 | 15/04/1815   |                                                                                                                                                                                                                                                                  |                 |               |                                                                                                     |                                                               |
| Serbia       | 198        | The Obrenovich Ottoman Principality of Serbia | 15/04/1815     | 1 | 01/01/1830   | After a period of Russian-Ottoman war, the Ottoman empire granted Serbia full autonomy (Britannica). Sources disagree on the importance of 1830; Stavrianos treating 1815 as year of full autonomy, whilst Britannica and Mazover see the change as substantial. | 7               | 7             | Ottoman Empire grants autonomy                                                                      | Britannica, Stavrianos 1963:21-22, Mazover 2000:83, Wikipedia |

| Country name | V-Dem code | Regime name                                              | v3regstartdate |   | v3regenddate | Notes to v3regenddate                                                                                                                                                                                                                                                                                                                                                                                                                               | v3regend-typeMS | v3regend-type | Notes to v3regendtype                                                                                                                                              | Sources                                      |
|--------------|------------|----------------------------------------------------------|----------------|---|--------------|-----------------------------------------------------------------------------------------------------------------------------------------------------------------------------------------------------------------------------------------------------------------------------------------------------------------------------------------------------------------------------------------------------------------------------------------------------|-----------------|---------------|--------------------------------------------------------------------------------------------------------------------------------------------------------------------|----------------------------------------------|
| Serbia       | 198        | The Obrenovich Autonomous Ottoman Principality of Serbia | 01/01/1830     | 1 | 14/09/1842   | National Assembly (Skupshtina) ousts Obrenovich and elects Karadjordje's son Alexander as prince of the principality. Argument for regime change: Britannica and Stavrianos (1963) describe a power struggle between supporters of the Obrenovich and Karadjordjevich clans throughout the period 1815-WWII.                                                                                                                                        | 12              | 12            | Election in Skupshtina, but not democratization - rather representation of power struggle between the clans and National Assembly dissatisfaction with Obrenovich. | Britannica, Stavrianos 1963:22, Wikipedia    |
| Serbia       | 198        | Karadjordjevic Principality of Serbia                    | 14/09/1842     | 0 | 23/12/1858   | The Skupshtina ousted Karadjordjevic in favour of Obrenovich.                                                                                                                                                                                                                                                                                                                                                                                       | 12              | 12            | Election in Skupshtina, but not democratization - rather representation of power struggle between the clans and National Assembly dissatisfaction with Obrenovich. | Britannica, Stavrianos 1963:22, Wikipedia    |
| Serbia       | 198        | Obrenovic Principality of Serbia                         | 23/12/1858     | 0 | 13/07/1878   | The Serbs declared war against the Ottoman Empire in 1876, and the war was ended by first the Treaty of San Stefano (May 1878), and then the Treaty of Berlin (13/07/1878) which ensured Serbia complete and final independence from the Ottoman Empire. The Kingdom of Serbia then came into being within the following couple of years, and was formally established in 1882 when Prince Milan Obrenovich was crowned King of Serbia (Wikipedia). | 6               | 6             | Coded loss in interstate war because the Ottoman Empire lost against the Serbs and granted autonomy in the treaty of Berlin.                                       | Britannica, Stavrianos 1963:22-25, Wikipedia |
| Serbia       | 198        | Obrenovich Kingdom of Serbia                             | 13/07/1878     | 0 | 15/06/1903   | King Alexander Obrenovich is assassinated by officers in the national assembly and Peter Karadjordjevic is invited to take back the throne (Britannica). His inauguration marks the date.                                                                                                                                                                                                                                                           | 3               | 3             | Obrenovich is assassinated                                                                                                                                         | Britannica, Conley 2012                      |

| Country name | V-Dem code | Regime name                                 | v3regstartdate |   | v3regenddate | Notes to v3regenddate                                                                                                                                                                                                                                                                                                                                                                                        | v3regend-typeMS | v3regend-type | Notes to v3regendtype                                                                             | Sources                                   |
|--------------|------------|---------------------------------------------|----------------|---|--------------|--------------------------------------------------------------------------------------------------------------------------------------------------------------------------------------------------------------------------------------------------------------------------------------------------------------------------------------------------------------------------------------------------------------|-----------------|---------------|---------------------------------------------------------------------------------------------------|-------------------------------------------|
| Serbia       | 198        | Karadjordjevich Kingdom of Serbia           | 15/06/1903     | 0 | 15/10/1915   | In October 1915, the German general von Mackensen launched a third offensive, supported by the Bulgarian army, and effectively forced the Serbs to retreat across Albania to the Adriatic Coast.                                                                                                                                                                                                             | 6               | 6             | Loss in WWI                                                                                       | Britannica, Wikipedia, Conley 2012        |
| Serbia       | 198        | Austrian-Hungarian occupation of Serbia     | 15/10/1915     | 1 | 01/11/1918   | Belgrade was recaptured by British, French, Greek and Serb forces, and Austria-Hungary agreed to an armistice.                                                                                                                                                                                                                                                                                               | 6               | 6             | Loss in WWI                                                                                       | Britannica                                |
| Serbia       | 198        | Kingdom of Serbia                           | 01/11/1918     | 0 | 01/12/1918   | In November 1918, the Yugoslav Committee had met in Geneva, followed by Zagreb severing of ties to Hungary and the agreement of a Union. On 1/12/1918 the prince regent Alexander was invited to proclaim the new union. On 5 Dec, the Kingdom of Serbs, Croats and Slovenes was presented to the world.                                                                                                     | 10              | 10            | The reigning Peter I joins Serbs and Croats in creating the Kingdom of Serbs, Croats and Slovenes | Britannica, Wikipedia                     |
| Serbia       | 198        | Kingdom of Serbs, Croats and Slovenes       | 01/12/1918     | 0 | 06/01/1929   | King Peter I dies at the age of 77 in 1921. The 20s were then tainted by cooperational challenges in the Skupshtina and the conflict climaxed when the Serb deputy Racic shot and killed three members of the opposition Croatian Peasant Party. On 6 Jan 1929, King Alexander I suspended the constitution and established a monarchic dictatorship with the new name Yugoslavia (Britannica and Wikipedia) | 2               | 2             | King Alexander I reacts to the turmoil of the Skupshtina by declaring a royal dictatorship.       | Britannica, Wikipedia                     |
| Serbia       | 198        | King Alexander's dictatorship of Yugoslavia | 06/01/1929     | 0 | 09/10/1934   | Alexander's reign was only partially supported and eventually gained large opposition. When the King was on an official visit to France, he was assassinated on 9 Oct 1934. A regency was established, headed by Prince Paul, the uncle of Peter II, the heir to the throne.                                                                                                                                 | 3               | 3             | Assassination of Alexander                                                                        | Britannica, Wikipedia, Lampe 1996:160-197 |

| Country name | V-Dem code | Regime name                                  | v3regstartdate |   | v3regenddate | Notes to v3regenddate                                                                                                                                                                                                                                                                                                                                                                                                                                       | v3regend-typeMS | v3regend-type | Notes to v3regendtype                                                                                                                                                                                                                                                                                                                                                                                               | Sources                                   |
|--------------|------------|----------------------------------------------|----------------|---|--------------|-------------------------------------------------------------------------------------------------------------------------------------------------------------------------------------------------------------------------------------------------------------------------------------------------------------------------------------------------------------------------------------------------------------------------------------------------------------|-----------------|---------------|---------------------------------------------------------------------------------------------------------------------------------------------------------------------------------------------------------------------------------------------------------------------------------------------------------------------------------------------------------------------------------------------------------------------|-------------------------------------------|
| Serbia       | 198        | Kingdom of Yugoslavia:<br>Prince Paul        | 09/10/1934     | 0 | 06/04/1941   | Discussions between the Serb leader Dragia Cvetkovi and Croatian Peasant Party leader Vladimir Macek resulted in the Sporazum (Agreement) of August 1939, on the eve of World War II, which made provision for an enlarged, partially self-governing Croatian banovina. Whether this prefigured a peaceful reconciliation of the Serb-Croat conflict remains unclear, as Yugoslavia was invaded and broken up by Nazi Germany and its allies in April 1941. | 6               | 6             | Loss to Axis powers in WWII                                                                                                                                                                                                                                                                                                                                                                                         | Britannica, Wikipedia, Lampe 1996:160-197 |
| Serbia       | 198        | German/<br>Italian<br>occupied<br>Yugoslavia | 06/04/1941     | 0 | 12/04/1945   | The occupation started to come to an end in Serbia in 1944, and the eventual and complete end of occupied Yugoslavia came when Yugoslav partisans and the Red Army broke the Syrman front on 12 April 1945.                                                                                                                                                                                                                                                 | 6               | 6             | Axis powers defeat in WWII                                                                                                                                                                                                                                                                                                                                                                                          | Britannica, Wikipedia, Lampe 1996:223-230 |
| Serbia       | 198        | SFR Yugoslavia                               | 12/04/1945     | 0 | 22/01/1990   | When the ruling Communist League dissolved in January 1990, Serbia (including the territories of Montenegro and Kosovo) contained their status as Republic of Serbia within Yugoslavia, but now without Communist rule.                                                                                                                                                                                                                                     | 12,11           | 11            | The dissolution of the Communist League is credited to an array of factors. Economic inequality and decline, popular discontent, rising nationalist/separatist sentiments and the rise of Milosevic all included. The change is coded liberalization without guidance of regime leaders because of the abrupt dissolution of the party - although democracy did not prevail in most of the Post-Yugoslav countries. | Britannica, Wikipedia, Lampe 1996:344-345 |



| Country name | V-Dem code | Regime name                                   | v3regstartdate |   | v3regenddate | Notes to v3regenddate                                                                                                                                                                                                                                                                                                                                                                                                                                                                                                                                                                                                                  | v3regend-typeMS | v3regend-type | Notes to v3regendtype                                                                                                           | Sources                                         |
|--------------|------------|-----------------------------------------------|----------------|---|--------------|----------------------------------------------------------------------------------------------------------------------------------------------------------------------------------------------------------------------------------------------------------------------------------------------------------------------------------------------------------------------------------------------------------------------------------------------------------------------------------------------------------------------------------------------------------------------------------------------------------------------------------------|-----------------|---------------|---------------------------------------------------------------------------------------------------------------------------------|-------------------------------------------------|
| Serbia       | 198        | Republic of Serbia within Yugoslavia          | 22/01/1990     | 0 | 27/04/1992   | On April 27, 1992, a new Federal Republic of Yugoslavia was inaugurated, comprising only Serbia and Montenegro. Its capital and assembly were both placed in Belgrade. The new state was not recognized by the entire international community, however, because of its continued military involvement in other republics of the former Yugoslavia (Britannica)                                                                                                                                                                                                                                                                         | 10              | 10            | Directed transformational process by sitting regime leaders                                                                     | Britannica, Lampe 1996:344-345, Blum (1992)     |
| Serbia       | 198        | Serbia part of Federal Republic of Yugoslavia | 27/04/1992     | 0 | 04/02/2003   | Despite widespread support for independence in Montenegro and plans to hold a referendum on secession in April 2002, jukanovi negotiated an agreement with Yugoslav and Serbian authorities in March, calling for Montenegros continued association with Serbia in a virtual federation. The agreement, approved by the Yugoslav parliament and the Montenegrin and Serbian assemblies in 2003, renamed the country Serbia and Montenegro, gave wide powers to the governments of Montenegro and Serbia, and allowed each republic to hold a referendum on independence and to withdraw from the union after three years (Britannica). | 10              | 10            | Directed transformational process by sitting regime leaders                                                                     | Britannica, Blum (1992), enddate from Wikipedia |
| Serbia       | 198        | Confederation of Serbia and Montenegro        | 04/02/2003     | 0 | E            | Kosovo declares independence in 2008, but its independence is not recognized by Serbia.                                                                                                                                                                                                                                                                                                                                                                                                                                                                                                                                                |                 |               |                                                                                                                                 | Britannica, startdate from Wikipedia            |
| Mexico       | 3          | General Commandancy of the Internal Provinces | 01/01/1784     | 1 | 15/09/1808   | On 15 September, defenders of the Empire, mostly European Spaniards, use force to put the Viceroy and the supporters of home rule in jail.                                                                                                                                                                                                                                                                                                                                                                                                                                                                                             | 1               | 1             | Spanish peninsulars and their army units assure imperial interests by putting viceregal authorities in jail. Considered a coup. | Guedea (2000: 277-282, 285-286)                 |

| Country name | V-Dem code | Regime name                                                              | v3regstartdate |   | v3regenddate | Notes to v3regenddate                                                                                                                                                                                                                                                                                                                                                      | v3regend-typeMS | v3regend-type | Notes to v3regendtype                                                                                                                                                                    | Sources                                                                            |
|--------------|------------|--------------------------------------------------------------------------|----------------|---|--------------|----------------------------------------------------------------------------------------------------------------------------------------------------------------------------------------------------------------------------------------------------------------------------------------------------------------------------------------------------------------------------|-----------------|---------------|------------------------------------------------------------------------------------------------------------------------------------------------------------------------------------------|------------------------------------------------------------------------------------|
| Mexico       | 3          | New Spain/Supreme Governing Central Junta                                | 15/09/1808     | 0 | 15/09/1812   | An uprising sparked by the priest Miguel Hidalgo cryout against the rule of Spanish peninsulars leads to a bloo, but they are not yet able to seriously challenge the authority of the colonial power. In Septemer 1812 New Spain promulgates the liberal Spanish constitution of Cadiz.                                                                                   | 9               | 9             | New Spain promulgates a liberal constitution drawn up by the Cortes in Cadiz. The constitution has a direct impa.                                                                        | Guedea (2000: 286-294); Hamnett (1999: 134-137)                                    |
| Mexico       | 3          | 1912 Constitution of Cdiz                                                | 15/09/1812     | 1 | 22/03/1814   | The colonial powerholders in New Spain adopt the constitution signifying allegiance to Spain. But in effect the constitution gives opportunities for the home rule movement to be elected to everything from local councils to the Cortes in Cadiz. Giving ayuntamientos formal power is a threat to colonial rule.                                                        | 10              | 10            | Considered intended transformational process in which the colonial administration follows the decrees of the newly reinstated Ferdinand VII.                                             | Guedea (2000: 292-295); Hamnett (1999: 139-141)                                    |
| Mexico       | 3          | New Spain under Viceroy Felix Maria del Rey/Viceroy Juan Ruiz de Apodaca | 22/03/1814     | 0 | 15/09/1820   | Efforts to organize the insurgency endures and the condition of New Spain runs parrallel to events taking place in Spain. A struggle between constitutionalists and royalists lead to restoration of the constitution of 1812 in Spain. By September 1820, the constitutional system is restored in New Spain.                                                             | 9               | 9             | The constitution enunciates a liberal bill of rights, and provides for the reestablishment of constitutional ayuntamientos (municipal governments). Considered political liberalization. | Guedea (2000: 294-296); Meyer and Sherman (1995: 291-294)                          |
| Mexico       | 3          | Constitutional regime based n constitution of 1812                       | 15/09/1820     | 1 | 28/09/1821   | The disintegration of colonial viceregal power in Mexico City, the restoration of the constitution, turmoil in Spain and the Cortes in Madrid's delaying taking action on colonial questions, lead the majority of New Spain to desire freedom from Spain's volatile politics. This creates an independence movement quite different from the insurgency movement of 1810. | 8               | 8             | Considered popular uprising in which New Spaniards from most segments of society join in the proclamation of independence from Spain.                                                    | Guedea (2000: 295-298); Meyer and Sherman (1995: 294-297); Hamnett (1999: 140-143) |

| Country name | V-Dem code | Regime name                                              | v3regstartdate |   | v3regenddate | Notes to v3regenddate                                                                                                                                                                                                                                                                                                                                                                                                                                      | v3regend-typeMS | v3regend-type | Notes to v3regendtype                                                                                                              | Sources                                                                            |
|--------------|------------|----------------------------------------------------------|----------------|---|--------------|------------------------------------------------------------------------------------------------------------------------------------------------------------------------------------------------------------------------------------------------------------------------------------------------------------------------------------------------------------------------------------------------------------------------------------------------------------|-----------------|---------------|------------------------------------------------------------------------------------------------------------------------------------|------------------------------------------------------------------------------------|
| Mexico       | 3          | The Mexican Empire/Suprema Junta Provisional Gubernativa | 28/09/1821     | 0 | 19/05/1822   | . In May the Mexican Cortes convenes and chooses Iturbide as monarch after a staged demonstration in Mexico City by royalist Junta members.                                                                                                                                                                                                                                                                                                                | 10, 1           | 10            | Could be considered intended transformational process by the Junta and Congress, or an orchestrated coup by followers of Iturbide. | Meyer and Sherman (1995: 294-296); Guedea (2000: 296-301); Hamnett (1999: 143-145) |
| Mexico       | 3          | The Mexican Empire/Constitutional Emperor Agustin I      | 19/05/1822     | 0 | 31/10/1822   | The inherent contradiction in the system leads to deepening conflict between Congress and the executive. The Junta, now dominated by conservatives interests, declares itself not to be bound by the constitution. Many in Congress do not accommodate themselves to the idea of monarchical Mexico and it is unacceptable to provincial and local authorities. Iturbide and the Junta start to suppress opposition, and in October he dissolves Congress. | 2               | 2             | Considered autocoup in which Iturbide dissolves the legislature and gives power to a self-appointed Junta.                         | Meyer and Sherman (1995: 305-307); Archer (2000: 316); Hamnett (1999: 144)         |
| Mexico       | 3          | The Mexican Empire/Emperor Agustii I                     | 31/10/1822     | 0 | 15/02/1823   | Agustin's arbitrary rule provides a pretext for revolt. One of the revolt leaders, commander Antonio Lpez de Santa Anna proclaim that Mexico should become a republic, and is joined by several provincial militias, and soon also by the General of the Imperial forces Jos Echverri who finds common cause with Santa Anna. Iturbide decides to reconvene Congress and abdicates in February 1823.                                                       | 0               | 0             | Coup by military                                                                                                                   | Meyer and Sherman (1995: 306-307); Archer (2000: 316)                              |
| Mexico       | 3          | Bravo-Victoria-Negrete Provisional Junta                 | 15/02/1823     | 1 | 27/11/1823   | The Consituent Assembly meet 27 November to draft a new constitution.                                                                                                                                                                                                                                                                                                                                                                                      | 10              | 10            | Considered intended transformational process in which the Provisional Junta hands over power the Constituent Assembly.             | Meyer and Sherman (1995: 313-314); Archer (2000: 316-317)                          |

| Country name | V-Dem code | Regime name                                | v3regstartdate |   | v3regenddate | Notes to v3regenddate                                                                                                                                                                                                                                                                                                                                                                                                                                                                    | v3regend-typeMS | v3regend-type | Notes to v3regendtype                                                                                                                                                        | Sources                                                                        |
|--------------|------------|--------------------------------------------|----------------|---|--------------|------------------------------------------------------------------------------------------------------------------------------------------------------------------------------------------------------------------------------------------------------------------------------------------------------------------------------------------------------------------------------------------------------------------------------------------------------------------------------------------|-----------------|---------------|------------------------------------------------------------------------------------------------------------------------------------------------------------------------------|--------------------------------------------------------------------------------|
| Mexico       | 3          | The Second Constituent Assembly            | 27/11/1823     | 0 | 04/10/1824   | A moderate proposal of shared sovereignty wins approval and the constitution is ratified 4 October.                                                                                                                                                                                                                                                                                                                                                                                      | 10              | 10            | An intended transformational process in which the Constituent Congress adopt a constitution that is effectively a compromise on the distribution of sovereignty.             | Archer (2000: 316-317); Meyer and Sherman (1995: 314-320)                      |
| Mexico       | 3          | United Mexican States/Constitution of 1824 | 04/10/1824     | 0 | 01/04/1829   | General Vicente Guerrero. Pedraza wins more states than Guerrero in elections, whereupon Santa Anna declares himself in revolt. President Victoria fails to suppress the revolt, and when Guerrero joins, Pedraza gives up.                                                                                                                                                                                                                                                              | 1               | 1             | Considered coup by liberal circles with their respective militias. Civilian politicians invite military leaders for assistance in pursuit of their goals (Hamnett 1999: 145) | Meyer and Sherman (1995: 318-320); Archer (2000: 326-327); Hamnett (1999: 145) |
| Mexico       | 3          | Presidency of Vincente Guerrero            | 01/04/1829     | 0 | 17/12/1829   | In August Santa Anna confronts the anticipated Spanish invasion of reconquest and defeats the Spanish. Few in Mexico can rival his popularity. Guerrero himself fails to restore stability in the country. Federalist-centralist struggle continues and when a revolt breaks out against Guerrero, the vice-president and many others follow, but Santa Anna fights on the president's side. Bustanmante succeeds to overthrow Guerrero, largely because of his influence with the army. | 5, 1            | 1             | Considered a coup by centralist and conservatives under the vice-presidents leadership. Could also be considered loss in civil war, based on the scale of the revolt.        | Meyer and Sherman (1995: 320-321); Archer (2000: 326-327)                      |

| Country name | V-Dem code | Regime name                                                  | v3regstartdate |   | v3regenddate | Notes to v3regenddate                                                                                                                                                                                                                                                                                                                                                                                        | v3regend-typeMS | v3regend-type | Notes to v3regendtype                                                                                                                                                                                                                                                                                                                                | Sources                                                                      |
|--------------|------------|--------------------------------------------------------------|----------------|---|--------------|--------------------------------------------------------------------------------------------------------------------------------------------------------------------------------------------------------------------------------------------------------------------------------------------------------------------------------------------------------------------------------------------------------------|-----------------|---------------|------------------------------------------------------------------------------------------------------------------------------------------------------------------------------------------------------------------------------------------------------------------------------------------------------------------------------------------------------|------------------------------------------------------------------------------|
| Mexico       | 3          | Presidency of Anastasio Bustamante                           | 17/12/1829     | 0 | 15/01/1833   | The repressive policies of Bustamante brings increasing opposition, especially from the states and from federalists in the capital. Once again Santa Anna prepares his troops for combat and rebels. Confronting many uprisings and battling several state militias, Bustamante's government is overwhelmed and compelled to surrender.                                                                      | 5, 1            | 5             | Santa Anna's forces manages to overthrow Bustamante. Could be considered loss in civil war because of the scale of the uprising. Santa Anna wins but by a peace settlement - the Plan de Zavaleta.                                                                                                                                                   | Meyer and Sherman (1995: 321-322); Archer (2000: 327-328)                    |
| Mexico       | 3          | Plan de Zavaleta/ Interim Presidency of Manuel Gomez Pedraza | 15/01/1833     | 1 | 01/04/1833   | In March the state legislatures cast their votes. Santa Anne wins the largest majority in Mexican history. Valentin Gmez Farias is chosen as vice-president.                                                                                                                                                                                                                                                 | 10              | 10            | Intended transformational process. Peaceful handover of power after states cast their presidential votes.                                                                                                                                                                                                                                            | Meyer and Sherman (1995: 324-326); Archer (2000: 328-330); Bazant (1977: 47) |
| Mexico       | 3          | Presidency of Antonio Lpez de Santa Anna                     | 01/04/1833     | 0 | 27/01/1835   | The liberal program enrages the clergy, the army and the conservative elites and demand an end to radical reform. Santa Anna returns to Mexico City accepting the argument that reforms have gone way so far that it could lead to civil war. He is convinced that the Constitution of 1824 has made Mexico ungovernable and changes his sympathies in the wake of Farias reforms. Santa Anna removes Faris. | 2, 1            | 1             | Traditional elites, the upper clergy and powerful army officers convince Santa Anna to take action to reestablish the nation on centralist foundations. In effect a shift in the power balance between federalists and centralists without a change of leader. Could be considered the equivalent of a coup. Or a combination of coup and autogolpe. | Meyer and Sherman (1995: 327-328); Archer (2000: 326-332)                    |

| Country name | V-Dem code | Regime name                                                     | v3regstartdate |   | v3regenddate | Notes to v3regenddate                                                                                                                                                                                                                                                                                                                                                                                                                                                                                                                                                                                                                                                                                                   | v3regend-typeMS | v3regend-type | Notes to v3regendtype                                                                                                                                                                                            | Sources                |
|--------------|------------|-----------------------------------------------------------------|----------------|---|--------------|-------------------------------------------------------------------------------------------------------------------------------------------------------------------------------------------------------------------------------------------------------------------------------------------------------------------------------------------------------------------------------------------------------------------------------------------------------------------------------------------------------------------------------------------------------------------------------------------------------------------------------------------------------------------------------------------------------------------------|-----------------|---------------|------------------------------------------------------------------------------------------------------------------------------------------------------------------------------------------------------------------|------------------------|
| Mexico       | 3          | Constitution of Siete Leyes/<br>Centralist regime of Santa Anna | 27/01/1835     | 0 | 16/07/1840   | The constitution reduces the autonomous states with their legislatures to departments with governors and councils appointed by the central regime. The president is to be elected indirectly to an eight-year term. Suffrage is restricted to men who earn a certain sum annually. The Texas crisis and federalist uprisings, the strongest being in Yucatán which deposes the governor, frustrate centralist efforts to solidify their system. By 1840 the centralist regime does not possess enough military power to control the situation. In the summer, violence spills from the regions into Mexico City when federalists led by Farias and General Jos Urrea temporarily arrests the then president Bustamante. | 5, 1            | 1             | Coup by otehr                                                                                                                                                                                                    | Archer (2000:332-335)  |
| Mexico       | 3          | Interregnum Mexico 1                                            | 16/07/1840     | 0 | 22/09/1841   | Disparate for a solution, conservatives conclude that the only answer to the chaos is to restore Santa Anna as interim president and impose strong centralism and dictatorial control.                                                                                                                                                                                                                                                                                                                                                                                                                                                                                                                                  | 12              | 12            | Santa Anna's army manages to crush the rebellion and restore some order. Regime does not collapse, but the situation comes so out of hand that the rebels manage to hold the president hostage for several days. | Archer (2000: 334-335) |

| Country name | V-Dem code | Regime name                                                                | v3regstartdate |   | v3regenddate | Notes to v3regenddate                                                                                                                                                                                                                                                                                                                                                                                                                                                                                                                     | v3regend-typeMS | v3regend-type | Notes to v3regendtype                                                              | Sources                                                       |
|--------------|------------|----------------------------------------------------------------------------|----------------|---|--------------|-------------------------------------------------------------------------------------------------------------------------------------------------------------------------------------------------------------------------------------------------------------------------------------------------------------------------------------------------------------------------------------------------------------------------------------------------------------------------------------------------------------------------------------------|-----------------|---------------|------------------------------------------------------------------------------------|---------------------------------------------------------------|
| Mexico       | 3          | Constitution of Siete Leyes/Bases Orgnicas/Centralist regime of Santa Anna | 22/09/1841     | 0 | 06/12/1844   | The Bases further strenghtens the presidency and stricter income qualifications for voting ensure that the centralist-conservative regime still domintate the political scene. By 1844, news that the United States plans to admit Texas into the union, leads to efforts to raise forces through conscription and to levy taxes on a heavily indepted nation. At this point Santa Anna lacks sufficient support to protect his presidency. In December, General Jos Herrera leads a coup which ousts Santa Anna. He is jailed in Jalapa. | 0               | 0             | Considered a military revolt led by General Herrera.                               | Archer (2000: 335); Hamnett (1999: 147)                       |
| Mexico       | 3          | Presidency of Jos Herrera                                                  | 06/12/1844     | 0 | 02/01/1846   | Joined by the Mexico City garrison under General Gabriel Valencia, Paredes marches into the capital 2 January. Two days later a new Council of Representatives elect him president.                                                                                                                                                                                                                                                                                                                                                       | 0               | 0             | Considered a military revolt led by generals Mariano Paredes and Gabriel Valencia. | Vzquez (2000: 356-359)                                        |
| Mexico       | 3          | Presidency of Mariano Paredes                                              | 02/01/1846     | 0 | 04/08/1846   | On the brink of war, Paredes failure to defend Mexico against U.S. hostility together with his monarchy project, makes him highly unpopular. He is left without supporters. Army garrisons rebel in support of the 1824 constitution and the return of Santa Anna.                                                                                                                                                                                                                                                                        | 0               | 0             | General Mariano Salas revolts in Mexico City with the support of Farias.           | Vzquez (2000: 360-362); Bazant (1977: 55-57)                  |
| Mexico       | 3          | Interim Government under Mariano Salas and Valentin Gomez Farias           | 04/08/1846     | 0 | 22/08/1846   | The Constitution of 1824 is restored.                                                                                                                                                                                                                                                                                                                                                                                                                                                                                                     | 10              | 10            | Considered intended transformational process favoured by federalists in power.     | Hamnett (1999: 154); Bazant (1977: 56-57); Vzquez (2000: 361) |

| Country name | V-Dem code | Regime name                                                          | v3regstartdate |   | v3regenddate | Notes to v3regenddate                                                                                                                                                                                                                                                                                                                                                                                                | v3regend-typeMS | v3regend-type | Notes to v3regendtype                                                                                                                                                                     | Sources                                                                         |
|--------------|------------|----------------------------------------------------------------------|----------------|---|--------------|----------------------------------------------------------------------------------------------------------------------------------------------------------------------------------------------------------------------------------------------------------------------------------------------------------------------------------------------------------------------------------------------------------------------|-----------------|---------------|-------------------------------------------------------------------------------------------------------------------------------------------------------------------------------------------|---------------------------------------------------------------------------------|
| Mexico       | 3          | Constitution of 1824/Governments of Santa Anna, Farias, Salas, Anaya | 22/08/1846     | 0 | 15/09/1847   | The Mexican War ends in victory for the United States. On the evening of 15 September, after days of heavy battles in and around Mexico City, their flag flutters over the national palace, and Santa Anna resigns the presidency.                                                                                                                                                                                   | 6, 7            | 6             | Loss in interstate war                                                                                                                                                                    | Vzquez (2000: 362-367); Bazant (1977: 56-57); Meyer and Sherman (1995: 350-351) |
| Mexico       | 3          | United States occupation                                             | 15/09/1847     | 0 | 30/05/1848   | On 30 May Mexico and the United States exchange ratified copies of the treaty. Presidential elections favor Jos Herrera, who by the middle of June re-instates the government in Mexico City when U.S. forces leave.                                                                                                                                                                                                 | 10              | 10            | Both the Mexican and the U.S. Congress ratify the treaty of Guadalupe Hidalgo ending the occupation. Intended transformational process by the U.S. occupying power?                       | Meyer and Sherman (1995: 351); Vzquez (2000: 366-369)                           |
| Mexico       | 3          | Constitution of 1824/Governments of Jos Herrera, Mariano Arista      | 30/05/1848     | 0 | 20/04/1853   | In the aftermath of the Mexican War, Congress consists of two political factions, the liberals and the conservatives. The Liberals stay in power until 1853. The years from 1848 until 1853 are marked by a fragile peacefulness where the parties' points of view are debated in public forum. But renewed strife is catalyzed by a military coup led by conservatives installing Santa Anna back in the executive. | 1, 0            | 1             | Considered a coup by the conservatives and their junta supporters inviting back Santa Anna as president.                                                                                  | Bazant (1977: 60)                                                               |
| Mexico       | 3          | Rule of Antonio Lopez de Santa Anna                                  | 20/04/1853     | 0 | 09/08/1855   | The Gadsden purchase, where Santa Anna sells of the last bit of land needed to round off the U.S. territorial acquisition of 1848, is a step too far for Juan Alvarez who launches a liberal popular revolt endorsed by many segments of society, including the peasants. In August Santa Anna tenders his resignation and goes into exile.                                                                          | 0, 1, 8         | 8             | The revolution of Ayutla enjoys a wider base of support than most previous antigovernment movements. Many rebellions take place around the country. Could be considered popular uprising. | Vanderwood (2010: 371-373); Meyer and Sherman 1995: 373-376); Bazant (1977: 61) |



| Country name | V-Dem code | Regime name                                                     | v3regstartdate |   | v3regenddate | Notes to v3regenddate                                                                                                                                                                                                                                                                                                                | v3regend-typeMS | v3regend-type | Notes to v3regendtype                                                                                                                        | Sources                                                                       |
|--------------|------------|-----------------------------------------------------------------|----------------|---|--------------|--------------------------------------------------------------------------------------------------------------------------------------------------------------------------------------------------------------------------------------------------------------------------------------------------------------------------------------|-----------------|---------------|----------------------------------------------------------------------------------------------------------------------------------------------|-------------------------------------------------------------------------------|
| Mexico       | 3          | Liberal interim governments of Jun lvarez and Ignacio Comonfort | 09/08/1855     | 0 | 05/02/1857   | The new constitution is promulgated in February 1857. The constitution provides for the abolition of clerical and military immunities, basic human rights, protected private property, equality before the law, freedom of speech, and the preservation of federalist system with its power in unicameral national legislature.      | 9               | 9             | Considered substantial political liberalization.                                                                                             | Meyer and Sherman (1995: 379-380); Bazant (1977: 72-73)                       |
| Mexico       | 3          | The Constitution of 1857                                        | 05/02/1857     | 0 | 15/12/1857   | The liberals soon find the implementation of the constitution going very slow. In December, the sitting president Comonfort allies himself with a conservative general, Flix Zuloaga, in a military coup.                                                                                                                            | 0, 2            | 2             | A self-coup accompanied by the military.                                                                                                     | Vanderwood (2010)                                                             |
| Mexico       | 3          | Comonfort presidency                                            | 15/12/1857     | 1 | 11/01/1858   | Within a month Comonfort becomes disenchanted with his new conservative partners. General Zuloaga decides, with clerical and military support, to oust Comonfort and assume the presidency for himself. Meanwhile, the liberals rally under Benito Jurez, Supreme Court leader and constitutionally next in line for the presidency. | 0               | 0             | A military leader, Zuloaga seeks to defend the country against "the anarchy he sees being unleashed by liberalism" and overthrows Comonfort. | Vanderwood (2010); Meyer and Sherman (1995: 381-282)                          |
| Mexico       | 3          | Conservative regime under Flix Zuloaga and Miguel Miramón       | 11/01/1858     | 0 | 01/01/1861   | The liberals eventually succeed in establishing a capital in Veracruz. For the first two years they are barely able to hold their guard against a well-equipped conservative army. By 1860 the tide turns, and on New Year's Day, Jurez and the liberals enter Mexico City.                                                          | 5               | 5             | Conservatives loose in civil war.                                                                                                            | Meyer and Sherman (1995: 381-384); Vanderwood (2010)                          |
| Mexico       | 3          | Constitution of 1857/Government of Benito Jurez                 | 01/01/1861     | 0 | 10/07/1863   | It takes two efforts before the French siege Mexico City in June 1863. On May 31, Jurez evacuates with his army for San Luis Potosi.                                                                                                                                                                                                 | 7               | 7             | Considered foreign intervention by French troops.                                                                                            | Meyer and Sherman (1995: 388-391); Vanderwood (2010); Hamnett (1999: 167-168) |

| Country name | V-Dem code | Regime name                                                                                                           | v3regstartdate |   | v3regenddate | Notes to v3regenddate                                                                                                                                                                                                                                                                                                                                                                                                                                                                                                                                                             | v3regend-typeMS | v3regend-type | Notes to v3regendtype                                                                                                                                                                                                                                                                        | Sources                                                                        |
|--------------|------------|-----------------------------------------------------------------------------------------------------------------------|----------------|---|--------------|-----------------------------------------------------------------------------------------------------------------------------------------------------------------------------------------------------------------------------------------------------------------------------------------------------------------------------------------------------------------------------------------------------------------------------------------------------------------------------------------------------------------------------------------------------------------------------------|-----------------|---------------|----------------------------------------------------------------------------------------------------------------------------------------------------------------------------------------------------------------------------------------------------------------------------------------------|--------------------------------------------------------------------------------|
| Mexico       | 3          | French occupation/<br>Assembly of Notables/<br>Regency of Juan Almonte,<br>Jos Mariano Salas and<br>Pelagio Labastida | 10/07/1863     | 0 | 10/06/1864   | The French secure central Mexico. In October a delegation of Mexican conservatives visits Maximilian, Napoleon's choice for the throne, and offer him the crown on behalf of the Assembly. On 10 June Maximilian arrives in Mexico.                                                                                                                                                                                                                                                                                                                                               | 10              | 10            | Intended transformational process by the sitting regime. Napoleon III signs the Convention of Miramar agreeing on the relationship between Napoleon and Maximilian.                                                                                                                          | Meyer and Sherman (1995: 391-393); Vanderwood (2010)                           |
| Mexico       | 3          | French occupation/<br>Rule of Emperor Maximilian I                                                                    | 10/06/1864     | 0 | 15/07/1867   | Several factors, including threats from the United States who openly support Jurez, lead to the withdrawal of French troops in 1866 and 1867. The liberal Juaristas under Generals Mariano Escobedo and Porfirio Diaz begin to put pressure on the Emperor. Maximilian surrenders after being surrounded by the liberal army on 15 May.                                                                                                                                                                                                                                           | 8               | 8             | Considered a republican uprising against an unpopular foreign emperor.                                                                                                                                                                                                                       | Meyer and Sherman (1995: 397-399); Vanderwood (2010)                           |
| Mexico       | 3          | Constitution of 1857/<br>Government of Benito Jurez/<br>Government of Lerdo de Tejada                                 | 15/07/1867     | 0 | 21/11/1876   | Congress re-elects Jurez for a fourth term. But the Constitution is not put aside for other reasons than this. Diaz does not accept the decision and revolts, but the matter is settled when Jurez dies of illness. It seems that Diaz revolts entirely on the principle of re-election. He accepts the following defeat in the elections after Jurez death. The winner Lerdo de Tejada follows the same policies formulated by Jurez. In March 1876, Diaz launches his Revolution of Tuxtepec tired of presidents seeking re-election. He captures Mexico City 21 November 1876. | 1               | 1             | Hamnett (1999) leaves it an open question whether the period of the Restored Republic (1867-1876) is marked by a constitutionalism or personal rule. A coup d'état, with soldiers in a number of states flocking to Diaz "effective suffrage" banner raises Porfirio Diaz to the presidency. | Vanderwood (2010); Meyer and Sherman (1995: 409-414); Hamnett (1999: 180, 196) |

| Country name | V-Dem code | Regime name                                                               | v3regstartdate |   | v3regenddate | Notes to v3regenddate                                                                                                                                                                                                                                                                                                                                                                                                                                                                                                                                                                                                                                                                                                                                         | v3regend-typeMS | v3regend-type | Notes to v3regendtype                                                                                                                                                                                                                                                                                                                                                                                                                                                                            | Sources                                                        |
|--------------|------------|---------------------------------------------------------------------------|----------------|---|--------------|---------------------------------------------------------------------------------------------------------------------------------------------------------------------------------------------------------------------------------------------------------------------------------------------------------------------------------------------------------------------------------------------------------------------------------------------------------------------------------------------------------------------------------------------------------------------------------------------------------------------------------------------------------------------------------------------------------------------------------------------------------------|-----------------|---------------|--------------------------------------------------------------------------------------------------------------------------------------------------------------------------------------------------------------------------------------------------------------------------------------------------------------------------------------------------------------------------------------------------------------------------------------------------------------------------------------------------|----------------------------------------------------------------|
| Mexico       | 3          | Constitution of 1857/<br>Governments of Porfirio Diaz and Manuel Gonzalez | 21/11/1876     | 0 | 01/12/1884   | Gonzlez is elected with a large majority, mainly due to Diaz' popularity. Diaz hands over power peacefully knowing that he could serve again after the intervening term of Gonzalez. Some argue that Diaz throws his support behind Gonzalez because he does not trust other candidates handing back power to him if he wins the 1884 elections (Hamnett 1999: 197). Others reject the portrayal of Gonzalez as a puppet of Diaz and argue that Diaz' dictatorial aspirations begins with his second term. (Meyer and Sherman 1995: 436-437; Coerver 1979). It seems that Diaz plays the political game well, using his four years out of office to build a new political machine to win the upcoming elections. In September 1884 he sweeps back to victory. | 2, 10           | 2             | Totally contrary to his principles, Diaz makes sure that he is able to run for president indefinitely. Diaz effectively initiates an autogolpe. He convinces both congress and his personal clients that strong man rule is necessary for political stability and economic development. His inner circle supervise official newspapers and marginalizes opposition. A further amendment to the constitution removes the specification for one reelection making it possible to run indefinitely. | Meyer and Sherman 1995: 436-438); Hamnett (1999: 196-200, 204) |
| Mexico       | 3          | Regime of Porfirio Diaz                                                   | 01/12/1884     | 0 | 25/05/1911   | Madero's victory over federal troops in Ciudad Jurez in April and the eruption of rebellion across the country, leads Diaz to sign a peace treaty and hand over power to Madero. Diaz signs his resignations 25 May.                                                                                                                                                                                                                                                                                                                                                                                                                                                                                                                                          | 8               | 8             | Considered popular uprising against the increasingly suppressive Diaz regime.                                                                                                                                                                                                                                                                                                                                                                                                                    | Meyer and Sherman (1995: 438, 502-505); Hart (2002: 438-439)   |
| Mexico       | 3          | Interim Government of Lon de la Barra                                     | 25/05/1911     | 0 | 05/11/1911   | Francisco Madero is opposed only by minor candidates and wins the elections. He is installed 5 November.                                                                                                                                                                                                                                                                                                                                                                                                                                                                                                                                                                                                                                                      | 10              | 10            | Considered intended transformational process in which an interim government hands over power to an elected one. Elections are not based on extensive suffrage.                                                                                                                                                                                                                                                                                                                                   | Hart (2002: 439); Meyer and Sherman (1995: 506-509)            |

| Country name | V-Dem code | Regime name                       | v3regstartdate |   | v3regenddate | Notes to v3regenddate                                                                                                                                                                                                                                                                                                                                                                                                       | v3regend-typeMS | v3regend-type | Notes to v3regendtype                                                                                                                     | Sources                                                                          |
|--------------|------------|-----------------------------------|----------------|---|--------------|-----------------------------------------------------------------------------------------------------------------------------------------------------------------------------------------------------------------------------------------------------------------------------------------------------------------------------------------------------------------------------------------------------------------------------|-----------------|---------------|-------------------------------------------------------------------------------------------------------------------------------------------|----------------------------------------------------------------------------------|
| Mexico       | 3          | Government of Francisco Madero    | 05/11/1911     | 0 | 18/02/1913   | A military coup begins in Mexico City in February 1913. General Manuel Mondragón, supported by artillery regiments, release rebel leaders Bernardo Reyes and Félix Díaz from prison and marches on the National Palace. After ten days of fighting in Mexico City, "the Ten Tragic Days", government forces under General Victoriano Huerta change sides and arrest Madero and numerous government officers on 18 February. | 0               | 0             | Considered a military coup after government forces take side with the rebels and order the arrest of the sitting president.               | Meyer and Sherman (1995: 517-521); Hart (2002: 444-445)                          |
| Mexico       | 3          | Government of Victoriano Huerta   | 18/02/1913     | 0 | 08/07/1914   | While Huerta decides to make a show of force against the Americans in the north, constitutionalists and Zapatistas fill the military vacuum in the center. Huerta's position becomes untenable. He resigns 8 July 1914.                                                                                                                                                                                                     | 5               | 5             | Considered regime loss in civil war.                                                                                                      | Hart (2002: 449-451); Meyer and Sherman (1995: 531-534)                          |
| Mexico       | 3          | Interregnum Mexico 3              | 08/07/1914     | 0 | 01/03/1917   | In late 1916 Carranza feels secure enough to convene a constituent Congress for the purpose of drawing up a new constitution. In special elections in March, Carranza wins and takes the oath of office 1 May.                                                                                                                                                                                                              | 5,12            | 5             | Loss in civil war                                                                                                                         | Meyer and Sherman (1995: 535-539); Hart (2002: 452-456); Hamnett (1999: 219-221) |
| Mexico       | 3          | Government of Venustiano Carranza | 01/03/1917     | 0 | 20/05/1920   | When Carranza bypasses his former general Obregón and attempts to impose a pliant successor in 1920, Obregón is joined by Plutarco Calles, Adolfo de la Huerta and leading Zapatistas in a march on Mexico City that drives out Carranza. Carranza is assassinated 20 May 1920.                                                                                                                                             | 1               | 1             | An armed insurrection led by General Obregón, Plutarco Calles and Adolfo de la Huerta. Not clear how much popularity the uprising enjoys. | Hart (2002: 461-465); Meyer and Sherman (1995: 545-550); Hamnett (1999: 221-223) |
| Mexico       | 3          | Congressional regime              | 20/05/1920     | 0 | 01/12/1928   | President Obregón is assassinated                                                                                                                                                                                                                                                                                                                                                                                           | 3               | 3             | President Obregón is assassinated                                                                                                         |                                                                                  |

| Country name | V-Dem code | Regime name                                 | v3regstartdate |   | v3regenddate | Notes to v3regenddate                                                                                                                                                                                                                                                                                                                             | v3regend-typeMS | v3regend-type | Notes to v3regendtype                                                                                                                                                                           | Sources                                                |
|--------------|------------|---------------------------------------------|----------------|---|--------------|---------------------------------------------------------------------------------------------------------------------------------------------------------------------------------------------------------------------------------------------------------------------------------------------------------------------------------------------------|-----------------|---------------|-------------------------------------------------------------------------------------------------------------------------------------------------------------------------------------------------|--------------------------------------------------------|
| Mexico       | 3          | PRI Mexico                                  | 01/12/1928     | 0 | 02/07/2000   | On 2 July 2000 the PAN candidate Vicente Fox Quesada was elected president, marking the end of 71 years of PRI presidential rule.                                                                                                                                                                                                                 | 9               | 9             | Coded directed liberalization because of the opening of the electoral system through legislation by the PRI in 1997                                                                             | Schedler (2000), Britannica                            |
| Mexico       | 3          | Post-single party Mexico                    | 02/07/2000     | 0 | E            |                                                                                                                                                                                                                                                                                                                                                   |                 |               |                                                                                                                                                                                                 | Schedler (2000), Britannica                            |
| China        | 110        | Qing Dynasty pre-occupation                 | 27/12/1722     | 0 | 13/10/1860   | In 1858, the Second Opium War or Arrow War with the French and the British leads to a temporary interruption in their dynastic rule. A combined invasion of British and French forces leads to an occupation of Beijing in 1860.                                                                                                                  | 7               | 7             | Considered foreign intervention by British and French forces.                                                                                                                                   | Roberts (1996: 214-226); Dillon (2010: 65-99, 100-104) |
| China        | 110        | British and French occupation of Beijing    | 13/10/1860     | 0 | 25/10/1860   | The Convention of Beijing, under which the Qing court guaranteed to respect the provisions of the treaty is dictated to the Prince and signed 24 and 25 October by the Prince and Britain and France.                                                                                                                                             | 12              | 10            | The foreign powers get what they came for. The signing of the Convention of Beijing concludes the conflict. It is a humiliating defeat to the Qing court. The court is restored to the capital. | Dillon (2010: 102-104); Britannica                     |
| China        | 110        | Qing Dynasty/ Reign of the Xianfeng Emperor | 25/10/1860     | 0 | 11/11/1861   | Xianfeng is succeeded by Tongzhi whos is only five years old. The Qing court appoints eight regents to rule during his minority. His mother Cixi and Ci'an, the wife of Xianfeng disapproves of the choice of regents, depose them in a palace coup and take power, ruling jointly as regents with Prince Gong. Most of the regents are beheaded. | 1               | 1             | Considered a palace coup.                                                                                                                                                                       | Dillon (2010: 104-106); Britannica                     |

| Country name | V-Dem code | Regime name                                                                 | v3regstartdate |   | v3regenddate | Notes to v3regenddate                                                                                                                                                                                                                                                                                                                                                                                                                                                                                                                                                                                                                        | v3regend-typeMS | v3regend-type | Notes to v3regendtype                                                                                                                                | Sources                            |
|--------------|------------|-----------------------------------------------------------------------------|----------------|---|--------------|----------------------------------------------------------------------------------------------------------------------------------------------------------------------------------------------------------------------------------------------------------------------------------------------------------------------------------------------------------------------------------------------------------------------------------------------------------------------------------------------------------------------------------------------------------------------------------------------------------------------------------------------|-----------------|---------------|------------------------------------------------------------------------------------------------------------------------------------------------------|------------------------------------|
| China        | 110        | Qing Dynasty/<br>Regency of Cixi, Ci'an and Prince Gong/<br>Tongzhi Regency | 11/11/1861     | 0 | 25/02/1875   | When Tongzhi dies the two empresses go on to act as regents. Their choice of Zaitian as successor should according to the laws of dynastic succession have been ineligible. However Empress Cixi is influential enough to prevail and Zaitian is crowned as the Guangxu Emperor 25 February 1875.                                                                                                                                                                                                                                                                                                                                            | 2, 10           | 2             | Could be considered a self-coup, but there is not much information on the transition of power from Tongzhi to Guangxu.                               | Dillon (2010: 105); Britannica     |
| China        | 110        | Qing Dynasty/Regency of Empress Cixi/Reign of the Emperor Guangxu           | 25/02/1875     | 0 | 21/09/1898   | Fearing that China is on the brink of partition because of increasing foreign pressure, with powers carving out spheres of influence on Chinese territory, and the inevitable defeat in war with Japan, The Emperor Guangxu initiates a number of radical reforms as a solution to the worsening conditions of his dynasty. The reforms include a total restructuring of government and the creation of a cabinet, a national assembly and a constitution. This leads the conservatives in the court to rally around the Empress Cixi. On 21 September 1898 the Emperor is detained and Cixi immediately restores herself as de facto ruler. | 1               | 1             | Cixi resumes the regency, after having nominally retired in 1889. She is brought back in power in a coup orchestrated by the Qing court's old order. | Dillon (2010: 115-117); Britannica |

| Country name | V-Dem code | Regime name                                          | v3regstartdate |   | v3regenddate | Notes to v3regenddate                                                                                                                                                                                                                                                                                                                                                                                                                                                                                                                                                                                                                                                                        | v3regend-typeMS | v3regend-type | Notes to v3regendtype                                                                                                                                                                                                                                                                                                                                          | Sources                            |
|--------------|------------|------------------------------------------------------|----------------|---|--------------|----------------------------------------------------------------------------------------------------------------------------------------------------------------------------------------------------------------------------------------------------------------------------------------------------------------------------------------------------------------------------------------------------------------------------------------------------------------------------------------------------------------------------------------------------------------------------------------------------------------------------------------------------------------------------------------------|-----------------|---------------|----------------------------------------------------------------------------------------------------------------------------------------------------------------------------------------------------------------------------------------------------------------------------------------------------------------------------------------------------------------|------------------------------------|
| China        | 110        | Qing Dynasty/<br>de-facto rule<br>of Empress<br>Cixi | 21/09/1898     | 0 | 14/08/1900   | In reaction to what they see as a menace of Western influence in China, militia units known as the boxers, move away from its anti-Qing traditions and transfer their allegiance to the court in a struggle against foreigners. Large numbers of people convert to the Boxer cause. Initially, the court attempts at a neutral stance, but soon finds itself supporting the rebellion. Cixi decided to take part in the hostilities by ordering troops to join the uprising. Foreign legations in Beijing are under siege for eight weeks. Foreign powers gather a 20 000 strong force that captures Beijing 14 August 1900. Russia uses the Boxer rebellion as pretext to invade Manchuria. | 6               | 6             | Defeat in interstate war                                                                                                                                                                                                                                                                                                                                       | Dillon (2010: 121-130); Britannica |
| China        | 110        | Eight Nation<br>Alliance<br>occupation               | 14/08/1900     | 0 | 07/09/1901   | It takes a year to get a treaty ready to be signed. The one-sided content of the Boxer Protocol is a humiliation for the Qing court inflicting severe punishments on Chinese officials. Cixi agrees to the terms after being assured of her continued reign. The foreign governments agree to withdraw their troops apart from legation guards.                                                                                                                                                                                                                                                                                                                                              | 10              | 10            | Considered an intended transformational process dictated by the foreign powers. The United States, part of the eight nation alliance, prevents a partition of China in the protocol insisting on the preservation of China's territorial integrity. The foreign powers are given the rights to occupy 12 towns along the coast to give them access to the sea. | Dillon (2010: 126-131); Britannica |

| Country name | V-Dem code | Regime name                                    | v3regstartdate |   | v3regenddate | Notes to v3regenddate                                                                                                                                                                                                                                                                                                                                                                                                                                     | v3regend-typeMS | v3regend-type | Notes to v3regendtype                                                                                                                                                                                                           | Sources                                          |
|--------------|------------|------------------------------------------------|----------------|---|--------------|-----------------------------------------------------------------------------------------------------------------------------------------------------------------------------------------------------------------------------------------------------------------------------------------------------------------------------------------------------------------------------------------------------------------------------------------------------------|-----------------|---------------|---------------------------------------------------------------------------------------------------------------------------------------------------------------------------------------------------------------------------------|--------------------------------------------------|
| China        | 110        | Qing Dynasty/<br>de-facto rule of Empress Cixi | 07/09/1901     | 0 | 01/01/1912   | On 14 November 1908 Emperor Guangxu suddenly dies at the age of 37. The Empress dies the day after. The Emperor is succeeded by Puyi (the Xuantong Emperor), the son of Prince Chun. Chun is nominal but ineffectual regent during the reign of the infant Emperor. Court policy remains in the hands of court officials who continue to attempt to modernize government until the Revolution of 1911. The Xinhai revolution overthrows the Qing Dynasty. | 8               | 8             | Initially sparked by an army mutiny in Wuhan urged on by revolutionaries and the province secession from the Empire triggers a chain reaction in which province after province declares their independence from the Qing court. | Dillon (2010: 135-139, 143, 145-146); Britannica |
| China        | 110        | Provisional presidency of Sun Yat-sen          | 01/01/1912     | 0 | 10/03/1912   | Meanwhile, Yuan Shikai, who at the time is prime minister at the court, and his troops demands the abdication of the emperor. On 12 February the Emperor abdicates. The day after Yuan Shikai declares his support for the Republic. The same day Sun Yat-sen expresses his willingness to step down as president in favor of Shikai. Shikai is formally inducted into office 10 March.                                                                   | 10,8,1          | 10            | Transformational process by sitting regime                                                                                                                                                                                      | Dillon (2010: 145-147); Britannica               |



| Country name | V-Dem code | Regime name                                                                              | v3regstartdate |   | v3regenddate | Notes to v3regenddate                                                                                                                                                                                                                                                                                                                                                                                                                                                                                                                                                                                                                                                                                                                                                                                  | v3regend-typeMS | v3regend-type | Notes to v3regendtype                                                                                                                                                                                                                                        | Sources                            |
|--------------|------------|------------------------------------------------------------------------------------------|----------------|---|--------------|--------------------------------------------------------------------------------------------------------------------------------------------------------------------------------------------------------------------------------------------------------------------------------------------------------------------------------------------------------------------------------------------------------------------------------------------------------------------------------------------------------------------------------------------------------------------------------------------------------------------------------------------------------------------------------------------------------------------------------------------------------------------------------------------------------|-----------------|---------------|--------------------------------------------------------------------------------------------------------------------------------------------------------------------------------------------------------------------------------------------------------------|------------------------------------|
| China        | 110        | Provisional Constitution of the Republic of China/ Provisional Presidency of Yuan Shikai | 10/03/1912     | 0 | 15/12/1913   | Song Jiaoren, leader of the Guomindang, at the moment the largest political coalition in the new Parliament works to bring Guomindang to power through constitutional mechanisms established under the provisional constitution. After winning elections, Jiaoren works for the cabinet to be brought under control of the majority party. Jiaoren is shortly in early 1913 found dead at the Shanghai railway station. In June Yuan Shikai dismisses provincial governors who had supported Guomindang in the elections. A deposed governor declares war on Yuan. The revolt is suppressed and Yuan orders that all representatives of Guomindang in the provincial assemblies be dismissed. On 15 December the National Assembly is replaced by a Political Conference completely under his control. | 2               | 2             | Considered a self-coup by the sitting leader Yuan Shikai.                                                                                                                                                                                                    | Dillon (2010: 146-152); Britannica |
| China        | 110        | Authoritarian Regime of Yuan Shikai                                                      | 15/12/1913     | 0 | 06/06/1916   | Having initially gained popularity for defending China's interests against Japan's ultimatum that China should concede key areas of economic policy and government to Japan under the Twenty-One Demands, he becomes highly unpopular with his attempt to restore monarchy. After some of the southwestern provinces declare independence from China 21 May 1916, he decides to abandon his plans of restoration of a monarchy hoping that this could avert civil war. The revolt spreads with military leaders declaring their provinces independent. Yuan Shikai dies on 6 June 1916.                                                                                                                                                                                                                | 4               | 4             | Several military revolts end in declarations of independence in province after province, but this does not topple the regime in Beijing, even if they lose large pieces of territory. Regime change in the capital comes as the result of the death of Yuan. | Dillon (2010: 152-159); Britannica |

| Country name | V-Dem code | Regime name                                        | v3regstartdate |   | v3regenddate | Notes to v3regenddate                                                                                                                                                                                                                                                                                                                                                                                                                                                                                                                                                     | v3regend-typeMS | v3regend-type | Notes to v3regendtype                                  | Sources                                     |
|--------------|------------|----------------------------------------------------|----------------|---|--------------|---------------------------------------------------------------------------------------------------------------------------------------------------------------------------------------------------------------------------------------------------------------------------------------------------------------------------------------------------------------------------------------------------------------------------------------------------------------------------------------------------------------------------------------------------------------------------|-----------------|---------------|--------------------------------------------------------|---------------------------------------------|
| China        | 110        | Beyiang military rule under Li Yuanhong            | 06/06/1916     | 0 | 14/06/1917   | Duan wants to side with the U.S. and enter war, but Li refuses, dismisses Duan and calls General Zhang Xun, a Qing-loyalist and Yuan Shikai supporter, to mediate. Zhang demands that Li dissolves the Parliament. Right after, Zhang enters Beijing with his army and sets about to restore the Dynasty.                                                                                                                                                                                                                                                                 | 0               | 0             | Military coup of the Capital to restore dynastic rule. | Dillon 2010: 160-162); Britannica           |
| China        | 110        | Zhang Xun's coup d'état/Manchu Restoration         | 14/06/1917     | 0 | 14/07/1917   | Duan captures Beijing 14 July. Duan resumes his role as prime minister, with Feng Gochang as acting president. Feng brings his own army division.                                                                                                                                                                                                                                                                                                                                                                                                                         | 0               | 0             | Counter coup by Duan's army to restore the Republic.   | Dillon (2010: 160-161) Britannica           |
| China        | 110        | Beyiang Military rule under Duan's Anhui Clique    | 14/07/1917     | 0 | 06/07/1920   | On 4 May 1919 a mass demonstration breaks out in which students in Beijing protest against the terms of the Paris Peace Conference, initiating the May Fourth Movement. Violence breaks out in Beijing. The overseas Guomindang endorses the movement. The government soon complies and refuses to sign the treaty. But the Anhui clique's power is deteriorating, and the Feng's faction, the Zhili Clique takes advantage of the situation. War breaks out in Beijing between the two military factions of Beyiang in July 1920, ending Anhui domination in government. | 8,5             | 5             | civil war                                              | Dillon (2010: 160-162, 175-178); Britannica |
| China        | 110        | Interregnum China 1/ Era of Warlords-post-July1920 | 06/07/1920     | 0 | 10/10/1928   | The National Revolutionary Army captures Beijing on 6 June 1928. On October 10 a National Government of the Republic of China is established, the first to be able to do so with justification since the death of Yuan Shikai. The Guomindang government in power is accepted by most of the south and most of the north.                                                                                                                                                                                                                                                 | 5               | 5             | Loss in civil war                                      | Dillon (2010: 158-159, 209-212); Britannica |

| Country name | V-Dem code | Regime name                                                                                 | v3regstartdate |   | v3regenddate | Notes to v3regenddate                                                                                                                                                                                                                                                            | v3regend-typeMS | v3regend-type | Notes to v3regendtype                                                                                                  | Sources                                                                        |
|--------------|------------|---------------------------------------------------------------------------------------------|----------------|---|--------------|----------------------------------------------------------------------------------------------------------------------------------------------------------------------------------------------------------------------------------------------------------------------------------|-----------------|---------------|------------------------------------------------------------------------------------------------------------------------|--------------------------------------------------------------------------------|
| China        | 110        | Nationalist government in Nanjing                                                           | 10/10/1928     | 0 | 13/12/1937   | Throughout the next decade, the Nationalists struggle with fragmentation and the growing CCP in the west. When the Sino-Japanese war begins, the nationalists and CCP decide agree to form a united front against Japan. On Dec 13, japanese froces capture the capital Nanjing. | 6               | 6             | Loss in inter-state war with Japan                                                                                     | Dillon (2010: 158-159, 209-212), Britannica, Brecher and Wilkenfeld (1997:157) |
| China        | 110        | Japanese occupation of Nanjing/ interregnum/ rivalling between Chinese and Japanese control | 13/12/1937     | 0 | 15/08/1945   | The Pacific War ended on Aug 15 1945 with formal Japanese surrender submitted on September 2.                                                                                                                                                                                    | 6               | 6             | Loss in inter-state war                                                                                                | Britannica, Brecher and Wilkenfeld (1997:157), Heazle and Knight (2007:94)     |
| China        | 110        | Interregnum/ NRA-PLA civil war                                                              | 15/08/1945     |   | 01/10/1949   | After over three years of war between Nationalist and Communist forces, PLA finally controlled most of the mainland and Chairman Mao proclaimed the establishment of the People's Republic of China                                                                              | 5,8             | 5             | Civil war loss for PLA's enemies and a popularly based revolution (Britannica). Civil war deemed most decisive factor. | Britannica, Heazle and Knight (2007:94), Gao (2009: 363)                       |
| China        | 110        | People's Republic of China                                                                  | 01/10/1949     |   | E            |                                                                                                                                                                                                                                                                                  |                 |               |                                                                                                                        | Britannica, Gao (2009: 363)                                                    |

## D A note on the coding of interregnum

HRD includes a dichotomous variable to capture interregnum periods (*v3interreg*), as listed in Appendix A. In HRD, interregnum is not coded as a way of “filling in” for complicated gradual changes (in contrast to the widely used Polity2 measure from Marshall, Gurr and Jaggers, 2013), such as the case of early-1920s Italy discussed in the paper. Rather an interregnum period is coded for situations where no governing elite or body is in place to effectively control/determines policies in major parts of the Polity.

One example is the three month-period that followed in Wallachia (now Romania) in 1848 after a group of revolutionaries forced the sitting Prince Bibescu to support the revolutionary program and name a provisional government. Two days later, the Prince abdicated because of increasing threats, and the Russian consul, responsible for the then-operating Russian Protectorate of Wallachia, left Bucharest. During the following three months, no attempt at consolidating rule was successful (Oetea, 1970; Treptow, 1996). The interregnum period of Wallachia ended when the Ottoman Porte invaded on September 25th 1848.

Another example is the two year-civil war that ravaged Egypt between 1803 and 1805. After Ottoman occupation in March 1803, Albanian forces under Tahir Pasha assumed government in May. When Pasha was assassinated in June that year, however, the area spiraled into civil war. When power was eventually consolidated, the subsequent regime of Mohammed Ali lasted for a total of 61 years.

Our coders were instructed to be conservative with applying the interregnum coding. One key note in this regard is that the common denominator for most interregnum periods is civil war. However, we also note that there are numerous instances of civil war where the country is still assigned a regime (i.e., scored as 0 on the interregnum dummy), for example territorial civil wars located in particular regions in the periphery but where a government still clearly controls power for most of the territory.

## E Common types of events that are candidates for regime change

Table A-4 gives an overview of the kinds of events that trigger regime change codings in HRD. For each type of event, we also give a very short description of how we delineate the threshold for whether or not a regime breakdown is coded. First and foremost, the latter thresholds describe when events are deemed to introduce a *substantial* change to the formal or informal rules that determine how leaders are selected and maintained (and, as such, clarifies the operational boundaries of our definition of regime change). Because of the empirical complexity of the different cases, and our aim to be flexible when coding each individual case, this list is far from exhaustive.<sup>1</sup> However, the list displays the most common rules-of-thumb applied consistently in the coding.

---

<sup>1</sup>If a case does not fit our scheme, we allow it to be coded as “other” rather than shoehorning it into our pre-defined categorization.

| Regime change event                | Description                                                                                                                                                                                                                                                                                                                                                                                                                                                                                                              |
|------------------------------------|--------------------------------------------------------------------------------------------------------------------------------------------------------------------------------------------------------------------------------------------------------------------------------------------------------------------------------------------------------------------------------------------------------------------------------------------------------------------------------------------------------------------------|
| Head executive term extensions     | Extension of presidential term limits is coded as regime change in HRD when this represents a clear move towards consolidating power by the sitting regime. Abolition of presidential term limits is always coded as regime change, if the sitting regime is not already a full-fledged and legislatively consolidated autocracy. They are coded with end type 2 - self-coup.                                                                                                                                            |
| Other autocratic legislation       | Legislative action such as changes to the constitution that do not concern the durability of the head executive office can also be coded regime change. This happens in instances where, e.g., severe restrictions are laid on the opposition, or one-party domination of the legislative branch is formalized. These instances are coded end type 2 - self-coup.                                                                                                                                                        |
| Suffrage extensions                | Suffrage extensions are coded as regime change when they concern large shares of the population and if, and only if, the extension occurs in regimes where the formal rules correspond with the informal rules. These are coded end type 9 - guided liberalization.                                                                                                                                                                                                                                                      |
| Other democratizing legislation    | Regime change is coded for instances such as formalization of democratic rights or promulgation of democratic institutions when these mark substantial departures from less democratic forms of government. They are coded if, and only if, they result in regimes where the formal rules correspond with the informal rules. These are coded end type 9 - guided liberalization.                                                                                                                                        |
| Independence                       | When polities that have had limited autonomy transfer into independence, this is coded as regime change when the previous non-independent entity still enjoyed a good deal of autonomy and their polities worked differently than its sovereign entity. <sup>2</sup> If the transition is made by creating a democratic constitution that is subsequently adhered to de facto, this is coded end type 9 - guided liberalization. If it does not have democratic qualities it is coded end type 10 - directed transition. |
| Restructuring legislative action   | Legislative action by the sitting regime that is not related to outright democratization or autocratization is coded regime change when they alter the core make-up of the regime such as transitioning from a parliamentary to a presidential system, or transitioning out of transitional regimes into regimes that are no more or less democratic than the previous, e.g. after coups or civil wars. These are coded end type 10 - directed transition.                                                               |
| Relatively free and fair elections | Free and fair elections are coded as regime change when held in regimes where this is not the norm, and where the results of the elections are adhered to. These are coded end type 9 - guided liberalization when the elections are part of a greater development by the state to liberalize. When they are not, they are coded end type 11 - liberalization without guidance of sitting regime.                                                                                                                        |
| Fraudulent elections               | Elections in which substantial reports of vote fraud are given, are coded as regime change when they appear in regimes which have otherwise held elections that are free and fair. Reports of vote buying do not suffice, there must also be deliberate obstructions of the right to a free vote or apparent tampering with election results. These instances are coded end type 2 - self-coup.                                                                                                                          |
| Wars                               | Inter- and intra-state wars are recorded as regime change when they efficiently either expel the sitting government or almost totally obstructs its ability to exert power. We code by emphasizing capitol rule - even when substantial areas of the country is beyond governmental control, the sitting regime continues as long as it has control over the capitol. These have their own end type 5 - civil war and 6 - inter-state war.                                                                               |
| <i>Effective</i> coups             | Describe different kinds of coups and coup settings?                                                                                                                                                                                                                                                                                                                                                                                                                                                                     |

Table A-4: Table of regime changing events (non-exhaustive)

## F Formal and informal rule changes and regime change

In the paper, we discussed how we consider the relevance of formal and informal rules for selecting and maintaining leaders when defining regimes, and how substantial changes to both formal and informal rules – in different circumstances – may trigger regime change. For instance, a constitutional democratic regime may end through changes in its formal rules (through substantial liberalization, e.g. introduction of universal suffrage, or through non-liberalizing legislative action, e.g. changing from parliamentarism to strong versions of presidentialism), or through changes to its informal rules (e.g., substantial manipulations of elections that allow incumbents to retain office). In the paper, we also discuss some key issues pertaining to when formal rules are used for identifying the regime (when formal and informal rules correspond, broadly speaking) as well as how we may consider the identity of the actors supporting the regime as operational heuristics in cases where informal rules define the regime. In this section, we present some considerations and important rules-of-thumb that complement this discussion.

The thresholds applied for considering changes in formal or informal rules to be understood as substantial (in widely varying real-world scenarios) must, in an application concerned with *de facto* rather than *de jure* changes, inevitably be related to subjective judgements. Very reasonable arguments can certainly be made to move the threshold both in a more restrictive and in a more lenient direction, for different types of scenarios. (As mentioned, our thresholds for coding regime changes are typically lower than those applied in the most comparable extant dataset, Geddes, Wright and Frantz (2014).) However, we have applied thresholds that we, after much thinking and some revisions after trial coding of particular cases, find to be the most sensible. Discussions of the sensibility of the particular locations of thresholds aside, one clear advantage with our approach is the emphasis we have placed on internal consistency in the coding, aiming to employ similar thresholds for similar types of scenarios across countries and time, better enabling cross-country and inter-temporal comparisons.

Table A-6 clarifies the instances in which formal and informal rules are used as foundations for regime coding, listed for each category of the regime end type variable. For each of these categories, we present typical examples of situations that would be considered a substantial change in formal or informal rules, leading to the coding of regime breakdown.

| <b>End type</b>              | <b>Informal rules emphasized</b>                                                                                                                                                                                                                         | <b>Formal rules emphasized</b>                                                                                                                                                       |
|------------------------------|----------------------------------------------------------------------------------------------------------------------------------------------------------------------------------------------------------------------------------------------------------|--------------------------------------------------------------------------------------------------------------------------------------------------------------------------------------|
| Military coups               | Military coups are always expressions of altered informal rules for selecting leaders                                                                                                                                                                    | None                                                                                                                                                                                 |
| Coups                        | Very often expressions of altered informal rules for selecting leaders                                                                                                                                                                                   | Can in rare instances focus on formal rules as in electoral coups                                                                                                                    |
| Self-coups                   | Self-coups are, by definition, actions driven by any given regime's incumbent to consolidate power. This can be achieved through changes to informal rules, e.g. through expulsion of coalition partners or removal of credible opposition.              | Can also be achieved by changing formal rules, e.g. through constitutional changes that diminish the role of the legislature or removal of restrictions on presidential term-limits. |
| Assassination                | Always expressions of informal rules changing as the leader must be dominant for the regime to change as a consequence of assassination                                                                                                                  | None                                                                                                                                                                                 |
| Natural death                | Always expressions of informal rules changing as the leader must be dominant for the regime to change as a consequence of natural death. Deaths of monarchs in formal hereditary monarchies will not constitute regime change (Example: Death of Franco) | None                                                                                                                                                                                 |
| Civil war                    | Most often informal through change of leadership (If formal rules in play in combination, these will be related to subsequent developments and not to take-over of power)                                                                                | In rare instances formal rules are emphasized when peace settlements or similar agreements are made                                                                                  |
| Inter-state war              | Most often informal through change of leadership (If formal rules in play in combination, these will be related to subsequent developments and not to take-over of power)                                                                                | In rare instances formal rules are emphasized when peace settlements or similar agreements are made                                                                                  |
| Foreign intervention         | In some cases concerned with informal rules because of leadership changes                                                                                                                                                                                | Can also be focused on formal rules i.e. through territorial concessions or the like                                                                                                 |
| Popular uprising             | Informal rules emphasized when the consequence of the uprising is leadership removal or step-down                                                                                                                                                        | Formal rules emphasized when the popular pressure has forced legislative action                                                                                                      |
| Directed democratization     | Concerned with informal rules if free and fair elections are held that conjoin the formal and informal rules                                                                                                                                             | Concerned with formal rules when democratic institutions, a constitution or other legislative action is made                                                                         |
| Directed transition          | Concerned with informal rules only to delineate the extent to which these correspond with formal rules                                                                                                                                                   | Most often concerned with formal rules through incumbent regime legislative action                                                                                                   |
| Non-directed democratization | By definition concerned with informal rules as the formal rules of the sitting regime cannot be changed without direction.                                                                                                                               | None                                                                                                                                                                                 |

Table A-6: Table of formal/informal rules



## G Clarifying and illustrating distinctions between directed transitions and self-coups

As we show in the paper, a substantial number of the regime breakdowns coded in HRD are so-called “directed transitions”. In the 14-category scheme for *v3regendtype*, we distinguish between guided transitions that are accompanied by political liberalization, on the one hand, and all other types of guided transitions. This distinction reflects the importance of elite-led processes of political liberalization historically, but also as a point of focus of theoretical models of regime change (see, e.g., O’Donnell, Schmitter and Whitehead, 1986; Acemoglu and Robinson, 2006). We provide the entire 14-category scheme for *v3regendtype* in Appendix A, but for the purpose of clarifying and distinguishing between these particular types of regime changes, here is the category wording for the two directed transition categories.

- Substantial political liberalization/democratization with some form of guidance by sitting regime leaders
- Other type of directed and intentional transformational process of the regime under the guidance of sitting regime leaders (excluding political liberalization)

Examples of guided liberalization processes include the type of processes observed, e.g., in Spain after the death of Franco, where democratic institutions were introduced (in a gradual manner) by extant regime elites, but also a number of substantial franchise extensions (often in 19th century polities) are coded as guided liberalization processes. One example is the introduction of the Reform Act in 1832 (March 15) in the United Kingdom, which marks the breakdown of what we have called the Post-Act of Settlement regime extending back to 1701.

Regarding the *other directed regime transitions*, these include different cases of intentionally guided regime changes pursued by the incumbent regime – excluding those that are related to liberalization processes. One typical case of such a directed transition is illustrated by the transformational process instigated by Charles de Gaulle in France after the Algiers crisis of 1958. Dated to January 8, 1959, when the new constitution came into force, the change led to the end of the parliamentary Fourth Republic, and the beginning of the current semi-presidential Fifth Republic. Other examples of directed transitions include the 1922 Latvian transition into a unicameral parliamentary republic under President Ulmanis, the creation of the Union of South Africa in 1910, the transition into the Pakistani Islamic Republic in 1956, as well as most transitions into partial and/or complete independence for

former colonies in Africa, Asia and Latin-America. (Exceptions are transitions where substantial uprisings, coups or civil war-like circumstances prompted the end of colonization.)

In addition to the two categories discussed above, *v3regendtype* includes a separate category for *self-coups*. In brief, a self-coup (or *autogolpe*) is a regime transformation involving the incumbent leader, resulting in a substantial consolidation of power in the hands of this leader. In other words, this regime transformation requires the intentional actions and cooperation of *at least* one key actor of the old regime, namely the chief executive (although other key regime actors are often also involved). The crucial defining feature of this category, however, and which sets it apart from the two guided transformation categories above, is that it represents a substantial concentration of power in the hands of the leader, after the change of the formal or informal rules for leader selection and maintenance has taken place. Since measuring power, and registering increased concentration of power, is inherently difficult, this means that this category is sometimes hard to differentiate from “other directed regime transitions”. Let us therefore further elaborate on and illustrate this issue:

Typical examples of self-coups occur with the passing of legislation that clearly tilts the balance of power towards the executive (typically president) and away from the legislative body. In some cases, such as the 1992 Fujimori self-coup in Peru, an event occurs that immediately restricts the choices available to the legislature or opposition in such a way that coding *v3regendtype* as self-coup stands out as a clear decision. Fujimori was assisted by the military in dissolving Congress, before having a new legislature elected and subsequently a new constitution promulgated (Levitsky, 1999). In other cases, such as the transition to Fascist rule in Italy, as discussed in the paper, coding *v3regendtype* as a guided transformation or self-coup is more readily debatable. The discussed Acerbo Law was, indeed, passed in the Senate, which based on a *de jure* approach to coding regime breakdown might indicate that the accompanying regime change did not entail a self-coup. Yet, when taking into account the strong-man tools used by the Fascist groupings, the inherent block on any opposition influence on policy that the Acerbo Law imposed, and the ultimate concentration of power in the hands of Mussolini, *v3regendtype* is coded as a self-coup.

## H Polity changes and regime changes

The country-units, or more precisely polity-units – note that several colonies and other non-independent entities are also treated as separate units – used for the HRD coding, are the careful definitions laid out in V-Dem’s Country Units document. We will not go into the details on how V-Dem delineates polities and determines their time series here, but instead refer interested readers to the noted document for the general rules for defining polities as well as details on exactly which areas are counted, in any given time period, for each polity. To exemplify the latter, we provide an excerpt for a definition of one country (Romania) from the V-Dem Country Units document (p. 27):

### Romania (190)

- *Coded:* 1789-
- *History:* Principality of Wallachia under Ottoman suzerainty (1789-1861); Austrian occupation (1789-1791); Russian Occupation (1807-1812); direct Ottoman rule (1821-1822); Russian occupation (1828-1834); incorporates Ottoman rayas north of the Danube (1829); Russian protectorate (1834-1854); Russian occupation (1853-1854); Austrian occupation (1854-1856); personal union with Moldavia (1859-1862); United Romanian Principalities (1862-1866); Romania (1866-1881); cedes three districts in southern Bessarabia to Russia and incorporates northern Dobruja (1878); Kingdom of Romania (1881-1947); annexes southern Dobruja (1913); occupied by Central Powers (1916); Dobruja annexed by Bulgaria (1918); Bessarabia incorporated into Romania (1918); incorporates Dobruja, Bukovina and Transylvania (1919); Soviet occupation (1944-1947); Peoples Republic of Romania (1947-1965); Socialist Republic of Romania (1965-1989); Romania (1989- ).
- *Note:* Please only code Wallachia between 1789 and 1862. Between 1900 and 1918 includes only pre-World War I territory. Includes Southern Dobruja 1913-1940, Bessarabia 1918-1940 and 1941-1944. Does not include Northern Transylvania 1940-1947. Does not include territories to the East annexed during World War II.

This categorization of polities also defines the time series for which an entity is coded for all relevant V-Dem variables, including the HRD variables. This brings up the question of how to code regime changes – following our definition laid out in the paper, pertaining to

substantial changes in formal or informal rules on the selection and maintenance of political leaders – in cases where polities merge, are born, disappear, or reappear. We discuss the rules and coding practices of some prominent such cases below, and illustrate them with specific examples.

## H.1 When federations/unions form and dissolve

In cases where two or more polities merge to form a single polity *or* when an existing polity dissolves, regime changes are coded in many, but not all, instances. In cases where mergers of separate polities into single countries, unions or federations occur – that is, when none of the merging or acquired polities become colonies or receive similar subordinate status – regime changes are always recorded for all polities involved, typically preceded by a regime end that is coded as a “directed transition”. Instances of such processes include the formation of the Union of Soviet Socialist Republics in 1922, the formation of the Kingdom of Serbs, Croats and Slovenes (later named the Kingdom of Yugoslavia) in 1918, and the formation of the Ethiopian - Eritrean Federation under Haile Selassie in 1952. These three instances were all results of directed transitions, even though the cooperation between the parties was substantially influenced by the uneven power balance in all three cases.

We may draw on the same polities for illustrating the coding pertaining to when countries dissolve. The dissolution of the USSR in 1991 was a seminal event, with global ripple effects. For many of the 15 now Post-Soviet states, the dissolution led to considerable societal and political upheaval. These instances are recorded as regime change for all polities involved, and the regime end type in *most of* these cases is coded as liberalization without direction from sitting regime leaders. In contrast, for the dissolution of the Ethiopian-Eritrean Federation in 1991-1993, only Eritrea, which *de facto* became a separate state in 1991, has this event recorded as regime change. Eritrea’s *de facto* independence, on May 24, came after the advances of the Tigray Peoples Liberation Front (TPLF/EPLF). This date of *de facto* independence is also registered as the date of regime change for Eritrea. But, May 1991 is a crucial month for Ethiopia as well. In fact, Ethiopia registers a regime change when Mengistu, the regime’s strong-man leader since 1974, was forced from power by the Ethiopian People’s Revolutionary Democratic Front (EPRDF). This happened on May 28th, which is the recorded date of regime change. These two situations are, of course, inherently interlinked – the fall of Mengistu’s regime, and the demise of centralized power of the incumbent regime, was linked to the successes of both the TPLF/EPLF as the EPRDF. Yet, the processes are treated as distinct in our regime coding, with different degrees of

relevance to each of the two polities, and they are thus not coded as the same regime-change event.<sup>3</sup>

While Ethiopia/Eritrea is a rather special case of a dissolving, contiguous polity in the dataset, a similar logic as that laid out above is applied for the coding of nearly all de-colonizing transitions. When a colony breaks away from its former colonizer, this is coded as a regime change in the colony but does typically not constitute a regime change event in the colonizer polity. This is because the *de facto* rules for selecting and maintaining leaders typically do not experience substantial changes in the colonizer. We turn now to a different issue of regime coding in colonies.

## H.2 The relevance of colonizer polity regime changes on the colonized polity

When colonies become independent, or achieve limited, but still meaningful autonomy in some way, regime change is, as noted, only coded for the colony. Similarly, regime change is only recorded in the colonized polity when transitions take effect for the local rule of the colony. In other words, regime changes in colonizer countries are only coded as regime changes in the colonized polity if the former clearly lead to *de facto* changes in the rules of relevance in the colony. This distinction is observed for most French colonies in the 20th century, when Vichy French administrations take over during WWII. For the colonies, the dates do, however, consistently follow the specific developments in the individual countries rather than internal French developments. The French Third Republic ends with the German invasion on July 10th, 1940. In most of French West Africa, the Vichy French government is instated on the same day, but in French Indochina, the change only happens two months later on September 22nd, after Japan interferes. In extension, when the transition from the Fourth to the Fifth Republic took effect in France, this event did not – in itself – imply transitions in the French Colonies. However, most French colonies transitioned into first partial, then full, independence, over the same period. While these regime changes occurring in both France and its colonies can very well be understood as causally interlinked, the transitions in each colony are treated and coded separately.

---

<sup>3</sup>Note that Eritrea is coded as a separate polity in V-Dem from 1900, covering, for example, the colonial era, the federation period and the period after 1962 when it is a constituent part of Ethiopia.

# I Temporal heterogeneity: Coups and uprisings

In the paper we estimated a Bayesian Change Point model on the average frequency of *all* regime breakdowns over time, responding to the question of whether there are likely “structural breaks” in the yearly stability of regimes across modern history. This exercise identified four plausible such change points, namely in 1798 (starting off the first high-frequency period, or wave, of breakdowns), 1881 (starting the first low-frequency, or crest, period), 1913 (starting second wave), and 1995 (starting second crest).

Yet, as our discussion and interpretation of descriptive statistics in the paper made abundantly clear, different modes of breakdowns have followed their own (non-linear) trends across this long time interval. For example, over the last couple of decades, we have seen a decreasing number of regime breakdowns due to coups (especially when compared to the 1960s and 70s), whereas regime breakdowns due to popular uprisings have been on the increase, at least since the late-1990s.

This notion of such different trends, reflecting that different eras may harbor structural conditions that conduce some types of regime changes but are less conducive to others, is further corroborated when we employ the same Change Point set-up to regime changes stemming (only) from particular modes of breakdown. For instance, we do not obtain similar – or even close to similar – timing of the estimated change points, when we analyze coups (by the military and by other actors, combined) and popular uprisings separately.

The results for coups are presented in Figures A-2 and A-3. Without describing or interpreting these results in too much detail, we simply note that for coups, the change point model detects two change points, namely right after 1960 and right after 1980. These years mark the start and end points of a clear uptick in the frequency of coup-induced transitions globally. As noted in the paper, the 1960s and 70s experienced a large number of coups, globally, and particularly in recently de-colonized states in Sub-Saharan Africa. (We here remind that these polities are typically coded back to 1900, or even further back, as colonies for HRD, and are thus also included in the sample prior to 1960). As we also discuss in the paper, recent work on coups, drawing on post-1960 data, have highlighted the declining trend for coups over the last few decades. What is less appreciated, however, is that the post-1960s period also marked a clear break with previous decades when it comes to coup frequency.

Interestingly, when we run our baseline model employed in the paper on coup-breakdowns for the split samples demarcated by the change point (see Table A-7), an intermediate level of democracy is clearly related to higher coup frequency for all time periods. For the economic

determinants, however, there are stronger indications of temporal heterogeneity. Notably, neither income level nor short-term growth were related to coups during the long 1789–1962 period. In contrast, we find that poorer countries were systematically more likely to experience coup breakdowns during the “coup wave” from 1962–1981, whereas during the low-frequency period after 1981 experiencing low short-term growth is clearly associated with increased risk of coup breakdown. These differences should direct our attention to structural factors and omitted variables that trend over time but are not included in the baseline model.

Figure A-2: Change points for coups, 1789-2014

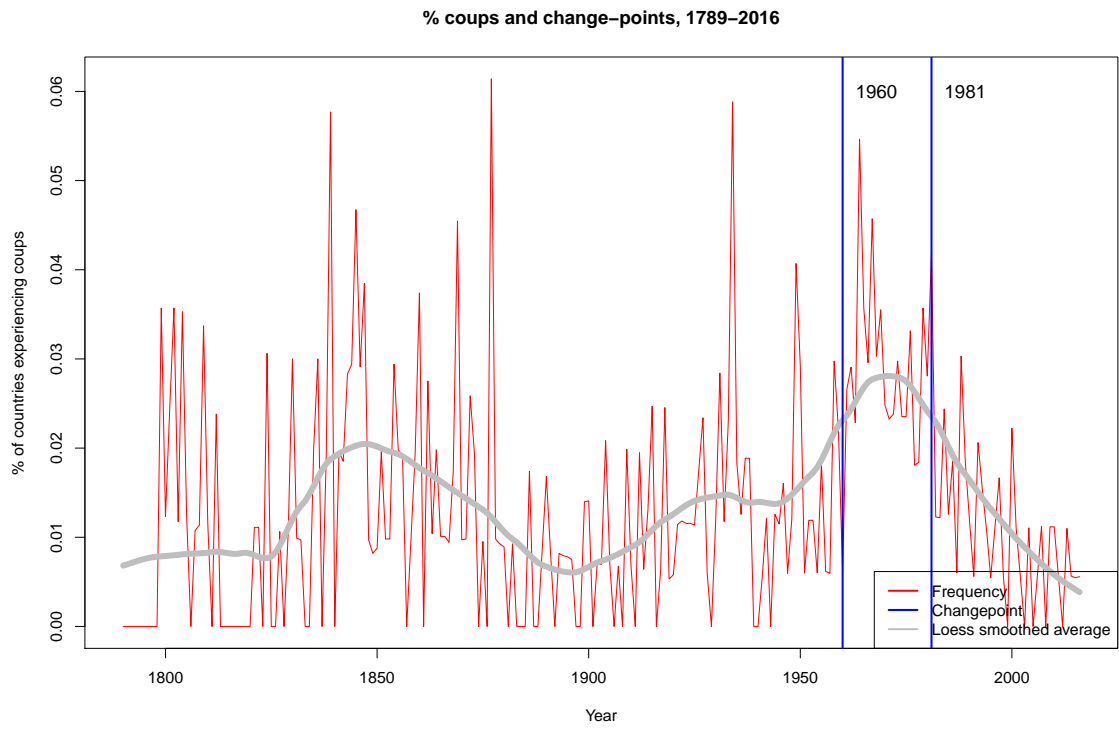

changepoints3.pdf



Figure A-3: Posterior probabilities of change points for coups, 1789-2014

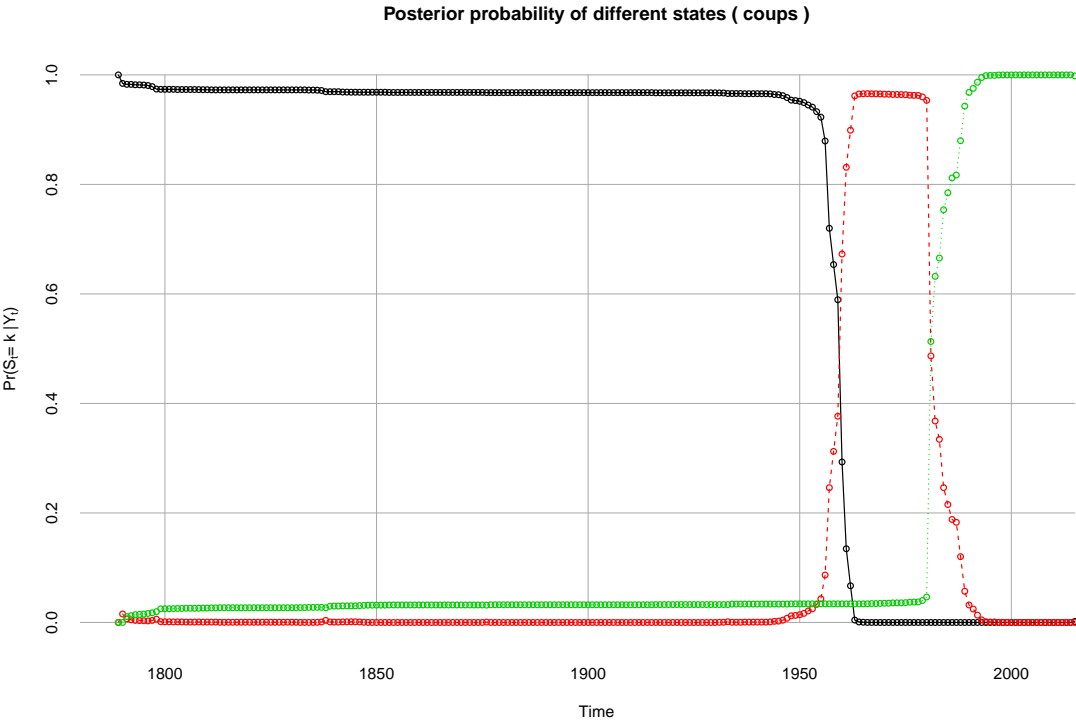

changepoints.pdf

Table A-7: Logit models on the risk of regime breakdowns due to coups across different periods, as defined by coup-specific change points

|                        | (A1)                  | (A2)                 | (A3)                 | (A4)                 |
|------------------------|-----------------------|----------------------|----------------------|----------------------|
| Period:                | 1789-2014             | 1789-1962            | 1962-1981            | 1981-2014            |
| Democracy              | 7.308***<br>(5.00)    | 5.610*<br>(2.56)     | 8.566**<br>(3.18)    | 12.337**<br>(3.13)   |
| Democracy <sup>2</sup> | -10.566***<br>(-5.36) | -10.550**<br>(-2.76) | -11.201**<br>(-3.06) | -14.629**<br>(-3.16) |
| L(GDP p.c.)            | -0.212<br>(-1.49)     | -0.021<br>(-0.11)    | -0.420*<br>(-2.02)   | -0.390<br>(-1.13)    |
| L(Population)          | 0.003<br>(0.05)       | 0.025<br>(0.34)      | 0.181*<br>(2.03)     | -0.148<br>(-0.96)    |
| GDP p.c. growth        | -0.009**<br>(-2.82)   | -0.011<br>(-1.25)    | -0.005<br>(-1.17)    | -0.030**<br>(-3.20)  |
| Region-FE              | ✓                     | ✓                    | ✓                    | ✓                    |
| Year-FE                | ✓                     | ✓                    | ✓                    | ✓                    |
| Duration terms         | ✓                     | ✓                    | ✓                    | ✓                    |
| N                      | 12404                 | 5946                 | 2472                 | 2743                 |
| AIC                    | 2750.379              | 1495.031             | 718.097              | 475.715              |
| ll                     | -1224.189             | -643.515             | -325.048             | -201.858             |

The change point model produces quite different results when we zoom in on regime breakdowns due to popular uprisings. While such breakdowns, overall, are less frequent than coup breakdowns, they have experienced some dramatic historical spikes over very limited time intervals, one such spike coming around 1848/9 and another during and right after WWI (see Figure A-4). Right around these spikes, the change point model is unable to yield strong predictions (as captured by the posterior probability densities) about which “state of the world” obtains, when it comes to the risk uprising-induced regime death (see Figure A-5). The model does, however, clearly predict that the pre-1848 state was differently from the state in, say, 1855, and likewise when comparing the years prior to WWI with, say, 1925.

Interestingly, the baseline model run on split samples, reported in Table A-8, provides suggestive evidence that the determinants of popular uprisings may have differed across the different “states” of modern history. Income level is significantly associated with breakdowns due to popular uprisings in the period spanning the two French revolutions of 1789 and 1848, but also during time period from 1917–2014. Note, however, that a higher level of income is *positively* associated with the outcome in the first period and *negatively* associated in the last period. Hence, while richer countries were more likely to experience regime deaths due to popular uprisings in the early part of modern history, poor countries are more likely to experience such regime breakdowns after WWI. In this latter period, low short-term economic growth is also associated with regime death due to uprisings, in contrast with the insignificant relationships observed in prior periods.

Figure A-4: Change points for uprisings, 1789-2014

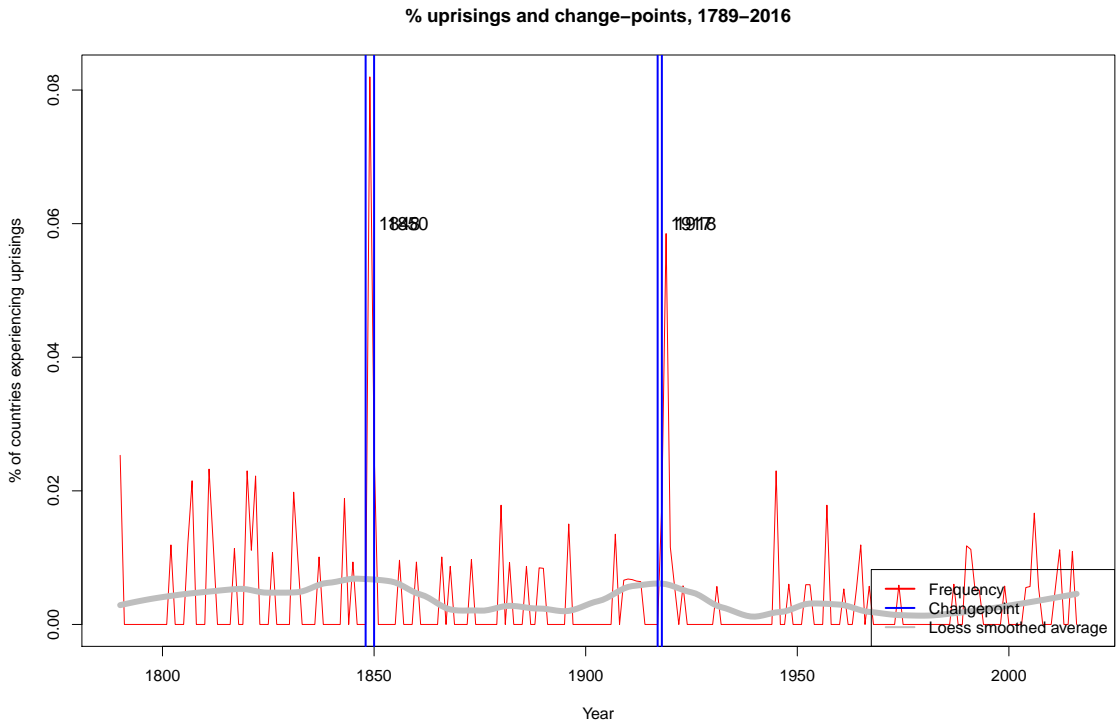

changepoints3.pdf

Figure A-5: Posterior probabilities of change points for uprisings, 1789-2014

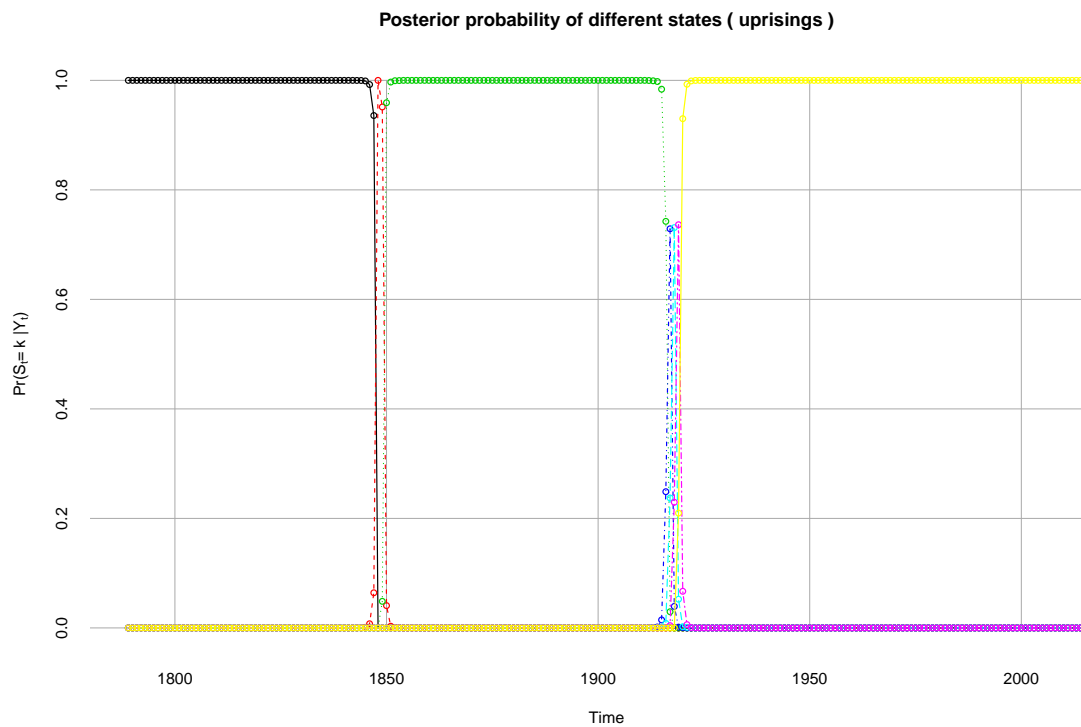

changepoints.pdf

Table A-8: Logit models on the risk of regime breakdown due to popular uprisings across different time periods, as defined by uprising-specific change points

|                        | (A1)                  | (A2)                 | (A3)               | (A4)                  |
|------------------------|-----------------------|----------------------|--------------------|-----------------------|
| Period:                | 1789-2014             | 1789-1848            | 1848-1917          | 1917-2014             |
| Democracy              | 7.308***<br>(5.00)    | 26.901*<br>(2.57)    | 6.376<br>(1.23)    | 10.118***<br>(5.49)   |
| Democracy <sup>2</sup> | -10.566***<br>(-5.36) | -68.443**<br>(-2.72) | -20.742<br>(-1.55) | -13.480***<br>(-5.65) |
| L(GDP p.c.)            | -0.212<br>(-1.49)     | 0.737*<br>(2.16)     | -0.436<br>(-1.79)  | -0.404*<br>(-2.41)    |
| L(Population)          | 0.003<br>(0.05)       | 0.174<br>(1.00)      | -0.162<br>(-1.05)  | 0.051<br>(0.73)       |
| GDP p.c. growth        | -0.009**<br>(-2.82)   | 0.034<br>(0.30)      | 0.013<br>(0.14)    | -0.008*<br>(-2.30)    |
| Region-FE              | ✓                     | ✓                    | ✓                  | ✓                     |
| Year-FE                | ✓                     | ✓                    | ✓                  | ✓                     |
| Duration terms         | ✓                     | ✓                    | ✓                  | ✓                     |
| N                      | 12404                 | 586                  | 1787               | 9580                  |
| AIC                    | 2750.379              | 271.299              | 550.556            | 1916.650              |
| LL                     | -1224.189             | -101.649             | -222.278           | -862.325              |

## J Robustness tests

This section contains two types of robustness tests. First, it reports analyses of regime breakdown, using the benchmark specification, on sub-samples distinguished by regime type. In order to divide the sample up into democracies and autocracies, we dichotomize the four-fold categorization by the V-Dem Regimes of the World (RoW) measure, so that “Electoral Democracies” and “Liberal Democracies” are counted as democracies and “Electoral autocracies” and “Closed autocracies” are counted as dictatorships. Thereafter, we present analyses – both on regime breakdown and on the four modes of breakdown analyzed also in the main paper – drawing on an alternative data source (The Maddison Project) for the GDP and population measures, accompanied by a short discussion on robustness of the different covariates.

## J.1 Regime breakdown models for sub-samples of democracies and dictatorships

Table A-9: Logit models on the risk of regime breakdown, separately estimated on democracies and dictatorships

|                        | (2.1)                 | (2.2)                 | (2.3)                | (2.4)                |
|------------------------|-----------------------|-----------------------|----------------------|----------------------|
| Regime-type            | Democracies           | Democracies           | Dictatorships        | Dictatorships        |
| Democracy              | 11.737***<br>(3.82)   | 15.335*<br>(2.51)     | 5.096***<br>(4.44)   | 5.802***<br>(3.93)   |
| Democracy <sup>2</sup> | -13.380***<br>(-4.98) | -19.950***<br>(-3.70) | -8.738***<br>(-4.01) | -8.897***<br>(-3.60) |
| L(Gdppc)               | 0.008<br>(0.03)       | -1.747<br>(-1.77)     | -0.196**<br>(-3.06)  | -0.155<br>(-1.53)    |
| L(population)          | 0.042<br>(0.51)       | -0.289<br>(-0.36)     | -0.043<br>(-1.45)    | -0.367*<br>(-2.57)   |
| Gdp growth             | -0.096*<br>(-2.08)    | -0.150**<br>(-2.87)   | -0.014*<br>(-2.32)   | -0.008<br>(-1.16)    |
| Region-FE              | ✓                     |                       | ✓                    |                      |
| Country-FE             |                       | ✓                     |                      | ✓                    |
| Year-FE                | ✓                     | ✓                     | ✓                    | ✓                    |
| Duration terms         | ✓                     | ✓                     | ✓                    | ✓                    |
|                        | 2112                  | 1408                  | 11966                | 12015                |
| Log likelihood         | -60.273               | -35.803               | -3406.474            | -3330.841            |



## J.2 Regime breakdown models using alternative data sources for measuring GDP and population

As noted in the main text, we re-estimate our core models using measures of GDP (levels and growth) and population that are drawn from a different data source than the one used for our main analysis. We discussed in the paper how our main analysis rely on the GDP per capita estimates from Fariss et al. (2017), benchmarked in the long Maddison time series. These data offer extensive coverage and may mitigate various forms of measurement error, but also have a large number of imputed observations. Thus, we here assess sensitivity to using the original time series from the Maddison project (Bolt and van Zanden, 2000). Both the population and GDP data are curated from V-Dem version 9, and we interpolate the GDP data by assuming constant growth rates in the time period between observations (this is especially relevant for the 19th century, where GDP observations are often reported with longer intervals, often 10 years).

Table A-10 re-runs our benchmark specifications on regime breakdown from Table 3 in the paper, but now using the  $\ln$  GDP p.c., GDP p.c. growth and  $\ln$  population measures from the Maddison project. First, we highlight that the number of observations for the model in Table A-10 in these regressions are lower than for the regressions reported in Table 3 of the paper. The reason is simply that the Fariss et al. data allow us to include several additional imputed observations, both for additional countries and (especially) for the early years of the time series (i.e., between 1789 and 1820). Second, however, when comparing the results in Table A-10 with the benchmark regressions, it turns out that we get fairly similar findings – both in terms of point estimates and t-values – for GDP levels and for GDP growth when using our alternative measure. Yet, we note that results are somewhat weaker when run on the Geddes et al. measure of regime change (Model 1) and somewhat stronger for GDP p.c. growth for some specifications that use the HRD data. The results for population also remain fairly similar when using the Maddison data as compared to the main results reported in the article, with the coefficients on population being indistinguishable from zero.

Table A-11 replicates the table where we disaggregate between different types of regime breakdown (coups, wars, uprisings, guided liberalizations). Once again, these tests show fairly similar patterns as for our benchmark regressions on breakdown types using the Fariss et al. data, reported in Table 4. Yet, we note that results are sometimes weakened in terms of statistical significance. This goes, for example, for GDP per capita growth when regime breakdown due to, respectively, coups or uprisings is the dependent variable. These reductions in t-values do, however, occur despite an increase in the absolute size of the

Table A-10: Logit models on the risk of regime breakdown, alternative measures of GDP and population

|                                          | (1.1)                 | (1.2)                 | (1.3)                | (1.4)                 |
|------------------------------------------|-----------------------|-----------------------|----------------------|-----------------------|
|                                          | GWF (1946–2013)       | HRD (1946–2013)       | HRD (1820–2014)      | HRD (1820–2014)       |
| Democracy                                | 13.391***<br>(5.93)   | 7.960***<br>(4.74)    | 6.285***<br>(6.28)   | 8.064***<br>(6.01)    |
| Democracy <sup>2</sup>                   | -19.875***<br>(-6.60) | -11.658***<br>(-5.67) | -9.741***<br>(-7.97) | -11.727***<br>(-8.11) |
| L(GDP p.c.)                              | -0.221<br>(-1.49)     | -0.220*<br>(-2.29)    | -0.217**<br>(-2.74)  | -0.332<br>(-1.92)     |
| GDP p.c. growth                          | -0.016<br>(-1.65)     | -0.023**<br>(-3.13)   | -0.024***<br>(-4.01) | -0.025***<br>(-3.72)  |
| L(population)                            | -0.050<br>(-0.68)     | -0.002<br>(-0.04)     | -0.020<br>(-0.52)    | -0.225<br>(-0.97)     |
| Regime duration (linear, squared, cubed) | ✓                     | ✓                     | ✓                    | ✓                     |
| Region-FE                                | ✓                     | ✓                     | ✓                    |                       |
| Country-FE                               |                       |                       |                      | ✓                     |
| Year-FE                                  | ✓                     | ✓                     | ✓                    | ✓                     |
| N                                        | 6290                  | 6290                  | 9442                 | 8757                  |
| ll                                       | -734.900              | -993.740              | -1892.692            | -1828.759             |

coefficient for GDP per capita growth in both regressions. The point estimates thus suggest that high short-term growth is even more strongly related to lower risk of breakdown when using the Maddison project data. However, the standard errors increase quite a lot. The fact that we get some increase in standard errors for some of the specifications is unsurprising, since these measures of GDP (and population) imply a greatly reduced sample, and the interpolation assuming constant growth rates in longer time intervals without data might also yield attenuation bias. Yet, while we put somewhat more confidence in the results reported in the paper, these robustness tests give us a note of caution when it comes to drawing very firm conclusions on the role of income growth and income level in affecting particular modes of breakdown. That being said, the fact that the coefficients do not change radically when altering the data source for measuring GDP could, in fact, also be interpreted as lending additional confidence to our benchmark results.

Table A-11: Logit models on the risk of different types of regime breakdown, alternative measures of GDP and population

|                                          | (2.1)                 | (2.2)              | (2.3)             | (2.4)                 |
|------------------------------------------|-----------------------|--------------------|-------------------|-----------------------|
| End-type                                 | Coup                  | Uprising           | War               | Reform                |
| Democracy                                | 9.719***<br>(4.60)    | 7.099<br>(1.46)    | -7.904<br>(-1.75) | 13.155***<br>(5.30)   |
| Democracy <sup>2</sup>                   | -14.560***<br>(-5.26) | -16.075<br>(-1.94) | 6.056<br>(1.13)   | -16.737***<br>(-5.90) |
| L(GDP p.c.)                              | -0.299<br>(-1.83)     | -0.622*<br>(-2.15) | 0.246<br>(0.52)   | 0.087<br>(0.57)       |
| GDP p.c. growth                          | -0.021<br>(-1.72)     | -0.027<br>(-1.06)  | -0.051<br>(-1.79) | -0.012<br>(-1.30)     |
| L(population)                            | -0.023<br>(-0.33)     | 0.184<br>(1.16)    | -0.194<br>(-1.00) | -0.037<br>(-0.41)     |
| Regime duration (linear, squared, cubed) | ✓                     | ✓                  | ✓                 | ✓                     |
| Region-FE                                | ✓                     | ✓                  | ✓                 | ✓                     |
| Year-FE                                  | ✓                     | ✓                  | ✓                 | ✓                     |
| N                                        | 6683                  | 2075               | 866               | 5421                  |
| ll                                       | -647.669              | -107.673           | -106.481          | -471.435              |

## References

- Acemoglu, Daron and James A. Robinson. 2006. *Economic Origins of Dictatorship and Democracy*. New York, NY: Cambridge University Press.
- Archer, Christon I. and William A. DePalo. 2000. "Discord, Disjunction, and Reveries of Past and Future Glories: Mexico's First Decades of Independence, 1810-1853." *Mexican Studies/Estudios Mexicanos* 16(1):189–210.
- Bazant, Jan. 1977. *A Concise History of Mexico*. Cambridge: Cambridge University Press.
- Beezley, William H and Michael Meyer. 2010. *The Oxford History of Mexico*. Oxford: Oxford University Press.
- Blum, Yehuda Z. 1992. "Russia takes over the Soviet Union's seat at the United Nations." *European Journal of International Law* 3:354.
- Bolt, Jutta and Jan Luiten van Zanden. 2014. "The Maddison Project: collaborative research on historical national accounts." *Economic History Review* 67(3):627–651.
- Brecher, Michael and Jonathan Wilkenfeld. 1997. *A Study of Crisis*. Ann Arbor, MI: University of Michigan Press, data available at <http://web.missouri.edu/polsjjh/ICB/>.
- Conley, Tanja Damljanović. 2013. "The backdrop of Serbian statehoods: morphing faces of the National Assembly in Belgrade." *Nationalities Papers* 41(1):64–89.
- Dillon, Michael. 2010. *China: A Modern History*. London: IB Tauris.
- Fariss, Christopher J., Charles D. Crabtree, Therese Anders, Zachary M. Jones, Fridolin J. Linder and Jonathan N. Markowitz. 2017. "Latent Estimation of GDP, GDP per capita, and Population from Historic and Contemporary Sources." Working paper.
- Freeze, Gregory. 2002. *Russia: A History*. Oxford: Oxford University Press.
- Gao, James Z. 2009. *Historical dictionary of modern China (1800-1949)*. Vol. 25 New York, NY: Scarecrow Press.
- Geddes, Barbara, Joseph Wright and Erica Frantz. 2014. "Autocratic Breakdown and Regime Transitions: A New Data Set." *Perspectives on Politics* 12(2):313–331.

- Guedea, Virginia. 2000. "The Process of Mexican Independence." *The American Historical Review* 105(1):116–130.
- Hamnett, Brian. 1999. *A Concise History of Mexico*. Cambridge: Cambridge University Press.
- Hart, John Mason. 2002. *Empire and revolution: The Americans in Mexico since the civil war*. Berkeley, CA: University of California Press.
- Heazle, Michael and Nick Knight. 2007. *China-Japan relations in the twenty-first century: creating a future past?* Cheltenham: Edward Elgar Publishing.
- Hudson, Rex A. and Dennis M. Hanratty. 1991. *Bolivia, a country study*. Washington, D.C.: Research Division, Library of Congress.
- Krastev, Ivan and Stephen Holmes. 2012. "An autopsy of managed democracy." *Journal of Democracy* 23(3):33–45.
- Lampe, John R. 1996. *Yugoslavia as History: There Was Twice a Country*. Cambridge: Cambridge University Press.
- Levitsky, Steven. 1999. "Fujimori and post-party politics in Peru." *Journal of Democracy* 10(3):78–92.
- Marshall, Monty G., Ted Robert Gurr and Keith Jagers. 2013. "POLITY IV PROJECT: Political Regime Characteristics and Transitions, 1800–2012." Center for Systemic Peace. Codebook.
- Mazower, Mark. 2000. *The Balkans*. NY: Random House.
- Meyer, Michael C and William L Sherman. 1995. *The course of Mexican History, 5th ed.* New York: Oxford University Press.
- Moss, Walter G. 2005. *A History of Russia. Vol. 2: To 1917*. London: Wimbledon Publishing Company.
- O'Donnell, Guillermo, Philippe Schmitter and Laurence Whitehead. 1986. *Transitions from Authoritarian Rule: Tentative Conclusions about Uncertain Democracies (Volume 4)*. The Johns Hopkins University Press.

- Oetea, Andrei. 1970. *The history of the Romanian people*. Vol. 1 Bucharest: Scientific Pub. Hoose [sic].
- Riasanovsky, Nicholas and Mark Steinberg. 2011. *A History of Russia*. Oxford: Oxford University Press.
- Schedler, Andreas. 2000. "The Democratic Revelation." *Journal of democracy* 11(4):5–19.
- Stavrianos, Lefteris S. 1963. *The Balkans: 1815-1914*. New York, NY: Holt, Rinehart and Winston.
- Treptow, Kurt W. 1996. *A History of Romania*. Bucharest: Center for Romanian Studies.
- Vanderwood, Paul. 2010. *Betterment for whom? The reform period: 1855-75*. Oxford: Oxford University Press.
